# Supplementary material for: Disease burden caused by respiratory syncytial virus compared with influenza among adults: a retrospective cohort study from Eastern Finland in 2017–2018
Source: PubMed Central journal article supplement — BMJ Open. 2022 Dec 19;12(12):e060805. doi: 10.1136/bmjopen-2022-060805 (PMC9764619; doi:10.1136/bmjopen-2022-060805), 2022-12-19
Supplement: bmjopen-2022-060805.draft_revisions.pdf [file bmjopen-2022-060805.draft_revisions.pdf]

# BMJ Open

BMJ Open is committed to open peer review. As part of this commitment we make the peer review history of every article we publish publicly available.

When an article is published we post the peer reviewers' comments and the authors' responses online. We also post the versions of the paper that were used during peer review. These are the versions that the peer review comments apply to.

The versions of the paper that follow are the versions that were submitted during the peer review process. They are not the versions of record or the final published versions. They should not be cited or distributed as the published version of this manuscript.

BMJ Open is an open access journal and the full, final, typeset and author-corrected version of record of the manuscript is available on our site with no access controls, subscription charges or pay-per-view fees (<http://bmjopen.bmj.com>).

If you have any questions on BMJ Open's open peer review process please email [info.bmjopen@bmj.com](mailto:info.bmjopen@bmj.com)

# BMJ Open

## Disease burden caused by RSV compared to influenza among adults.

|                               |                                                                                                                                                                                                                                                                                                                                                                                                                                                                 |
|-------------------------------|-----------------------------------------------------------------------------------------------------------------------------------------------------------------------------------------------------------------------------------------------------------------------------------------------------------------------------------------------------------------------------------------------------------------------------------------------------------------|
| Journal:                      | <i>BMJ Open</i>                                                                                                                                                                                                                                                                                                                                                                                                                                                 |
| Manuscript ID                 | bmjopen-2022-060805                                                                                                                                                                                                                                                                                                                                                                                                                                             |
| Article Type:                 | Original research                                                                                                                                                                                                                                                                                                                                                                                                                                               |
| Date Submitted by the Author: | 05-Jan-2022                                                                                                                                                                                                                                                                                                                                                                                                                                                     |
| Complete List of Authors:     | Hämäläinen, Aleks; University of Eastern Finland Institute of Clinical Medicine; Kuopio University Hospital<br>Savinainen, Ellamaria; University of Eastern Finland Institute of Clinical Medicine; Kuopio University Hospital<br>Hämäläinen, Sari; Kuopio University Hospital<br>Sivenius, Katariina; Kuopio University Hospital<br>Kauppinen, Juha; ISLAB<br>Koivula, Irma; Kuopio University Hospital<br>Patovirta, Riitta-Liisa; Kuopio University Hospital |
| Keywords:                     | Respiratory infections < THORACIC MEDICINE, Epidemiology < INFECTIOUS DISEASES, Infection control < INFECTIOUS DISEASES                                                                                                                                                                                                                                                                                                                                         |
|                               |                                                                                                                                                                                                                                                                                                                                                                                                                                                                 |

SCHOLARONE™  
Manuscripts

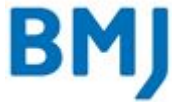

I, the Submitting Author has the right to grant and does grant on behalf of all authors of the Work (as defined in the below author licence), an exclusive licence and/or a non-exclusive licence for contributions from authors who are: i) UK Crown employees; ii) where BMJ has agreed a CC-BY licence shall apply, and/or iii) in accordance with the terms applicable for US Federal Government officers or employees acting as part of their official duties; on a worldwide, perpetual, irrevocable, royalty-free basis to BMJ Publishing Group Ltd ("BMJ") its licensees and where the relevant Journal is co-owned by BMJ to the co-owners of the Journal, to publish the Work in this journal and any other BMJ products and to exploit all rights, as set out in our [licence](#).

The Submitting Author accepts and understands that any supply made under these terms is made by BMJ to the Submitting Author unless you are acting as an employee on behalf of your employer or a postgraduate student of an affiliated institution which is paying any applicable article publishing charge ("APC") for Open Access articles. Where the Submitting Author wishes to make the Work available on an Open Access basis (and intends to pay the relevant APC), the terms of reuse of such Open Access shall be governed by a Creative Commons licence – details of these licences and which [Creative Commons](#) licence will apply to this Work are set out in our licence referred to above.

Other than as permitted in any relevant BMJ Author's Self Archiving Policies, I confirm this Work has not been accepted for publication elsewhere, is not being considered for publication elsewhere and does not duplicate material already published. I confirm all authors consent to publication of this Work and authorise the granting of this licence.

**Title:** Disease burden caused by RSV compared to influenza among adults.

**Authors:** Aleksi Hämäläinen<sup>1,2</sup>, Ellamaria Savinainen<sup>1,2</sup>, Sari Hämäläinen<sup>2</sup>, Katariina Sivenius<sup>2</sup>, Juha Kauppinen<sup>3</sup>, Irma Koivula<sup>2</sup>, Riitta-Liisa Patovirta<sup>2</sup>

### Affiliations

<sup>1</sup> University of Eastern Finland Institute of Clinical Medicine, Kuopio, Pohjois-Savo, FI

<sup>2</sup> Department of Medicine, Kuopio University Hospital, Kuopio, Pohjois-Savo, FI

<sup>3</sup> Eastern Finland Laboratory Centre Joint Authority Enterprise (ISLAB), Kuopio, Pohjois-Savo, FI

### Corresponding author:

Aleksis Hämäläinen

Department of Medicine, Kuopio University Hospital, Kuopio, Pohjois-Savo, FI

Yliopistonranta 1, 70210 Kuopio

E-mail: [aleh@student.uef.fi](mailto:aleh@student.uef.fi)

Phone number: +358405496077

**Word count:** 3074

**Keywords:** Respiratory infections; Epidemiology; Infection control

### Abstract

**Objectives:** Respiratory syncytial virus (RSV) is one of the most important causes of lower respiratory tract illnesses. In this study, we examined the number and severity of RSV infections among adult patients. The underlying diseases and background information of patients with RSV were examined and compared to the patients with influenza.

**Design:** Retrospective cohort study.

**Setting:** Patients receiving tertiary care services in Kuopio University Hospital (KUH) district in Eastern Finland.

**Participants:** 725 patients (152 with RSV infection and 573 with influenza) treated in KUH between November 2017 and May 2018.

**Primary and secondary outcome measures:** Hospitalization and mortality.

**Results:** Compared to influenza, RSV caused a more serious disease in terms of hospitalization (84.2% vs. 66.0%,  $p<0.001$ ), incidence of pneumonia (37.5% vs. 23.2%,  $p<0.001$ ), need for antibiotics (67.1% vs. 47.3%,  $p<0.001$ ) and supplementary oxygen (50.7% vs. 31.2%,  $p<0.001$ ). The all-cause mortality during hospitalization and 30 days after discharge was higher among the RSV-infected patients (8.6% vs. 3.5%,  $p=0.010$ ). Solid malignancies (23.1% vs. 5.0%,  $p=0.042$ ), chronic kidney disease (30.8% vs. 5.8%,  $p=0.011$ ) and higher number of underlying conditions (3.2 vs. 2.2,  $p=0.016$ ) were more common among the RSV-

1  
2  
3 infected non-survivors compared to survivors. RSV was an independent risk factor for hospitalization (aOR  
4 2.035; 95% CI 1.17 to 3.55) and mortality (aOR 2.288; 95% CI 1.09 to 4.81) compared to influenza.  
5

6 **Conclusions:** Among all the screened patients, those with RSV infection were older and had more  
7 underlying conditions than patients with influenza. They had increased likelihood of hospitalization and  
8 mortality when compared to influenza. Solid malignancies and chronic kidney disease seemed to be  
9 independent risk factors for death among RSV-infected patients. During RSV and influenza epidemics, it is  
10 important to test patients with respiratory symptoms for RSV and influenza to prevent the spread of the  
11 infections among elderly and chronically ill patients.  
12  
13  
14  
15

### 16 **Strengths and limitations of this study**

- 17 • Respiratory syncytial virus (RSV) is one of the most important causes of lower respiratory tract  
18 illnesses.
- 19 • RSV has been discovered to cause mortality equal or close to the mortality related to influenza  
20 among elderly patients.
- 21 • This retrospective cohort study compares the effects of multiple background factors on clinical  
22 outcomes in RSV- and influenza-infected adult patients.
- 23 • The major limitation of the study was that there was no possibility to gather information about  
24 patient recovery from primary care facilities.
- 25 • During the study, there was a major RSV epidemic in Finland explaining the high number of RSV  
26 infections compared to influenza.  
27  
28  
29  
30  
31  
32

### 33 **Introduction**

34 Respiratory syncytial virus (RSV) is one of the most important causes of lower respiratory tract illnesses [1].  
35 RSV bronchitis or pneumonia can lead to hospitalization and even death, especially in elderly people with  
36 underlying conditions [2]. A major RSV epidemic is observed in Finland every other winter, often starting in  
37 November-December. In addition, minor epidemics occur between the major ones [3,4].  
38  
39

40 In adults  $\geq 50$  years of age, RSV is responsible for 1-10% of acute respiratory tract infections [5]. RSV  
41 hospitalization rates in adults  $\geq 65$  years of age are estimated to be 1/1000 and 0.3/1000 person-years in  
42 industrialized and developing countries, respectively [6]. The mortality rate among the elderly patients  
43 treated in hospital due to RSV infection varies between 1.1-15.9% [7,8,9,10,11,12] and the 30-day all-cause  
44 mortality rate varies between 3.2-13.7% [9,10,12,13,14].  
45

46 Among elderly patients living in long-term care facilities, RSV is estimated to cause 7.2-11.4% of the  
47 hospitalizations among patients with chronic pulmonary diseases [2]. The hospitalized patients with RSV  
48 infection and influenza-like symptoms have often immunosuppressive medication, hematological  
49 malignancy, or other malignancy [15,16]. In immunocompromised patients, RSV is reported to account for  
50 2.8-10.3% of all acute respiratory tract infections, and 8.6-20.0% of all respiratory viral infections [5]. 30-  
51 70% of the patients admitted to hospital because of RSV have cardiovascular disease [7,9,14,15]. During  
52 hospitalization, 14-25% of the patients with RSV infection experience a cardiovascular complication such as  
53 worsening heart failure, myocardial infarction, or stroke [7,8,13]. Adults that are obese are more likely to  
54 be hospitalized from RSV infection and influenza than normal-weight adults [17]. Smoking is associated  
55 with higher risk of hospital admissions after influenza infection [18].  
56  
57  
58  
59  
60

1  
2  
3 Among adult patients hospitalized because of RSV infection, hypoxemia is reported in 53-68% and  
4 pneumonia in 31-80% of the patients [7,8,11,13,14,15,16]. Empiric antibiotics are used on 76-95% of the  
5 patients [7,8,10], and blood cultures are positive in 4% of the patients [8]. 10-25% of the RSV-infected  
6 hospitalized adults require treatment in intensive care unit (ICU) [10,11,16] and mechanical ventilation is  
7 needed for 10-36% of the patients [7,8,10]. The average duration of hospitalization has been reported to  
8 range from 4 to 9 days [8,10,12,13,16].  
9

10  
11 When compared to the prevalence of influenza, the prevalence of RSV has been estimated to be up to  
12 twice as high among patients at risk and over 65 years [19]. In Finland, seasonal influenza has been  
13 estimated to cause 500-1000 excess deaths annually [20]. The patients hospitalized due to RSV are older,  
14 have more chronic diseases and are more likely living in long-term care compared to influenza [8,14,15,21].  
15 Among elderly patients aged over 65 years, the in-hospital mortality related to RSV has been estimated to  
16 be equal or close to the mortality related to influenza [5,15]. However, the 30-day mortality rate has been  
17 estimated to be higher among RSV patients [14]. The patients with RSV infection have more often  
18 underlying lung diseases, need more often supplemental oxygen and ventilatory support, and develop  
19 more complications, such as pneumonia, than the patients with influenza [8,13,14,15].  
20  
21  
22  
23

## 24 Objectives

25  
26 The aim of the study was to examine the number and severity of RSV infections among adults over the age  
27 of 18 in Eastern Finland during an RSV epidemic. The prevalence of several chronic conditions is higher in  
28 the study area than elsewhere in Finland [22]. Thus, we also aimed to examine the underlying diseases and  
29 background information of patients with RSV and to compare them to corresponding factors among  
30 patients with influenza.  
31  
32  
33

## 34 Methods

### 35 Study subjects

36  
37 This retrospective cohort study was carried out in Kuopio University Hospital (KUH). KUH is one of Finland's  
38 five university hospitals. The hospital is a 600-bed teaching hospital that provides tertiary care services to  
39 approximately 800,000 citizens in Central and Eastern Finland. Patients treated in KUH due to influenza and  
40 RSV were identified retrospectively from the information-management system of Eastern Finland  
41 Laboratory Centre (ISLAB) between November 2017 and May 2018. During the study time, there was a  
42 major RSV epidemic in Finland [3]. Patients under 18-years of age and patients with mixed infections  
43 (influenza and RSV) were excluded from the study. Also, patients from regional hospitals were excluded if  
44 there was a lack of availability of electronic medical records.  
45  
46  
47  
48

### 49 Data collection

50  
51 We collected clinical data by using electronic medical records. For general characteristics and background  
52 information we observed age, body mass index (BMI, kg/m<sup>2</sup>), gender, smoking status, type of housing and  
53 underlying conditions. All underlying conditions were classified according to the 2021 ICD-10-CM codes:  
54 hypertension (ICD-10-CM I10-I15), ischemic heart disease (ICD-10-CM I20-I25), heart failure (ICD-10-CM  
55 I50), cerebrovascular disease (ICD-10-CM I60-70), COPD (ICD-10-CM J44), asthma (ICD-10-CM J45), solid  
56 malignancy (ICD-10-CM C00-C80), hematological malignancy (ICD-10-CM C81-C96), diabetes (ICD-10-CM  
57 E08-E13), chronic kidney disease (ICD-10-CM N18) and dementia (ICD-10-CM F00-F03). In addition, the  
58 patients with immunosuppressive medication due to other diseases were identified. Type of housing was  
59  
60

1  
2  
3 divided into living independently and living with daily support (nursing homes, home care). Smoking status  
4 was divided into smokers and non-smokers. The requirement and duration of hospitalization, requirement  
5 of supplemental oxygen and non-invasive ventilation support (bilevel positive airway pressure, continuous  
6 positive airway pressure or nasal high flow), requirement of treatment in ICU and duration of ICU care,  
7 requirement of invasive ventilation, blood culture sample results, use of antibiotics, prevalence of  
8 pneumonia, all-cause mortality during hospitalization and during the following 30 days after discharge were  
9 documented. The diagnosis of pneumonia was made by treating physicians based on clinical status,  
10 laboratory tests and X-rays.  
11  
12

### 13 Laboratory methods

14  
15 The nasopharyngeal samples of influenza and RSV were taken from the patients during hospital visits. The  
16 samples were stored in Copan UTM-RT tubes for transport. The fresh samples were analyzed with Xpert  
17 Xpress FLU/RSV test (Cepheid) according to the manufacturer's instructions in the clinical microbiology  
18 laboratory of KUH (Eastern Finland Laboratory Centre Joint Authority Enterprise, ISLAB).  
19  
20

### 21 Analyses

22  
23 Data were collected from electronic medical records into an SPSS file and the data analysis was  
24 completed using SPSS version 25 (IBM Corp. Released 2017. IBM SPSS Statistics for Windows, Version 25.0.  
25 Armonk, NY: IBM Corp.). The general characteristics were summarized using descriptive statistics. The  
26 statistical analyses between categorical variables were done by using the chi-square ( $\chi^2$ ) test. The Fisher's  
27 exact test was used instead of chi-square test when analyzing categorical variables, if any cells had low (<5)  
28 minimum expected count. The two-tailed t-test was used for the comparison between continuous  
29 variables, and descriptive statistics were used to summarize means (standard deviation, SD). Univariate and  
30 multivariable logistic regression analyses were used to calculate the crude odds ratios and adjusted odds  
31 ratios (aORs) of the factors associated with hospitalization and all-cause mortality during hospitalization  
32 and 30 days after discharge. BMI was categorized to <20 and >30 for the logistic regression analysis. In the  
33 multivariable model, only the variables with a p value <.100 at univariate analysis were included, and the  
34 final model was built using a stepwise forward procedure to calculate the adjusted odds ratios (aORs). The  
35 Hosmer-Lemeshow (HL) test was used for goodness of fit for logistic regression models. The results with a  
36 p-value lower than 0.05 were counted statistically significant.  
37  
38  
39

### 40 Patient and public involvement

41  
42 Patients and/or the public were not involved in the design, or conduct, or reporting, or dissemination plans  
43 of this research.  
44  
45  
46

## 47 **Results**

### 48 Study population

49  
50 In total, 2484 patients with positive screening test results for influenza and RSV were identified at ISLAB  
51 between November 2017 and May 2018. Patients under 18-years of age, patients without electronic  
52 medical record available and patients with mixed infections (influenza and RSV, n= 6) were excluded from  
53 the study. After this, total of 725 patients (152 with RSV infection and 573 with influenza infection) were  
54 included in the study. BMI was available on 99 (65.1%) of the RSV-infected patients and on 396 (69.1%) of  
55 the influenza-infected patients. Smoking status was available on 115 (75.7%) of the RSV-infected patients  
56 and on 412 (71.9%) of the influenza-infected patients. Other characteristics and all hospital events were  
57 available on all patients in the electronic medical record.  
58  
59  
60

## Characteristics

The characteristics of the study population are presented in Table 1. The RSV-infected patients were significantly older than the influenza-infected patients (mean 73.3 vs. 68.1 years, SD 15.1 vs. 18.4,  $p < 0.001$ ). They were also more likely to have diagnoses of hypertension (60.5% vs. 45.5%,  $p = 0.001$ ) and heart failure (17.8% vs. 10.5%,  $p = 0.014$ ) than the patients with influenza infection. There were no significant differences in gender, smoking status, housing status or other underlying conditions between patients with influenza and RSV infections, but the patients with RSV infection had more underlying conditions (mean 2.32 vs. 1.93, SD 1.44 vs. 1.51,  $p = 0.005$ ) than those with influenza infection.

**Table 1.** Characteristics of the study population.

|                                                   | RSV<br>n=152<br>n (%) | Influenza<br>n=573<br>n (%) | P-value |
|---------------------------------------------------|-----------------------|-----------------------------|---------|
| Male                                              | 75 (49.3)             | 262 (45.7)                  | 0.427   |
| Age (years), mean (SD)                            | 73.3 (15.1)           | 68.1 (18.4)                 | <0.001  |
| BMI (kg/m <sup>2</sup> ), mean (SD)               | 27.0 (5.7)            | 27.3 (5.7)                  | 0.560   |
| Smoking status                                    |                       |                             |         |
| Smoking                                           | 26 (17.1)             | 89 (15.5)                   | 0.454   |
| Non-smoker                                        | 89 (58.6)             | 323 (56.4)                  |         |
| Housing status                                    |                       |                             |         |
| Independent                                       | 102 (67.1)            | 418 (72.9)                  | 0.155   |
| Supported                                         | 50 (32.9)             | 155 (27.1)                  |         |
| Number of underlying conditions, (n)<br>mean (SD) | 2.32 (1.44)           | 1.93 (1.51)                 | 0.005   |
| Hypertension                                      | 92 (60.5)             | 261 (45.5)                  | 0.001   |
| Ischemic heart disease                            | 51 (33.6)             | 154 (26.9)                  | 0.104   |
| Heart failure                                     | 27 (17.8)             | 60 (10.5)                   | 0.014   |
| Cerebrovascular disease                           | 28 (18.4)             | 77 (13.4)                   | 0.121   |
| COPD                                              | 20 (13.2)             | 57 (9.9)                    | 0.253   |
| Asthma                                            | 39 (25.7)             | 135 (23.6)                  | 0.590   |
| Solid malignancy                                  | 10 (6.6)              | 47 (8.2)                    | 0.509   |
| Hematological malignancy                          | 7 (4.6)               | 16 (2.8)                    | 0.257*  |
| Diabetes                                          | 34 (22.4)             | 122 (21.3)                  | 0.774   |
| Chronic kidney disease                            | 12 (7.9)              | 43 (7.5)                    | 0.872   |
| Dementia                                          | 22 (14.5)             | 71 (12.4)                   | 0.495   |
| Immunosuppressive medication                      | 11 (7.2)              | 65 (11.3)                   | 0.142   |

Continuous variables (age, BMI, number of underlying conditions) are presented as mean and standard deviation (SD), categorical variables are presented as number (n) and percent (%). P-values were calculated with two-tailed t-test for continuous variables and with chi-square ( $\chi^2$ ) test and Fisher's exact test among categorical variables.

RSV respiratory syncytial virus, BMI body mass index, COPD chronic obstructive pulmonary disease

\* = calculated with Fischer's Exact Test.

## Hospitalization

The hospital events of the study population are presented in Table 2. The patients with RSV infection were hospitalized more often than those with influenza (84.2% vs. 66.0%,  $p < 0.001$ ). During hospitalization, the RSV-infected patients needed supplementary oxygen (50.7% vs. 31.2%,  $p < 0.001$ ) and developed pneumonia (37.5% vs. 23.2%,  $p < 0.001$ ) more often than patients with influenza. Blood culture positivity was detected



more often (4.6% vs. 1.7%,  $p=0.045$ ) and antibiotics were used more often (67.1% vs. 47.3%,  $p<0.001$ ) among patients with RSV than those with influenza. The all-cause mortality during hospitalization and 30 days after discharge was higher among RSV-infected patients than among those infected by influenza (8.6% vs. 3.5%,  $p=0.010$ ). There was no significant difference in the in-hospital all-cause mortality between the two groups.

**Table 2.** Outcomes and hospital events of the study population.

|                                                                        | RSV<br>n=152<br>n (%) | Influenza<br>n=573<br>n (%) | P-value |
|------------------------------------------------------------------------|-----------------------|-----------------------------|---------|
| Hospitalized                                                           | 128 (84.2)            | 378 (66.0)                  | <0.001  |
| Discharged from ER                                                     | 24 (15.8)             | 195 (34.0)                  |         |
| Hospital treatment (days), mean (SD)                                   | 4.5 (4.5)             | 4.1 (5.7)                   | 0.311   |
| Need of supplementary oxygen                                           | 77 (50.7)             | 179 (31.2)                  | <0.001  |
| Non-invasive ventilation                                               | 17 (11.2)             | 50 (8.7)                    | 0.352   |
| ICU admission                                                          | 6 (3.9)               | 23 (4.0)                    | 0.970   |
| ICU treatment duration (days), mean (SD)                               | 2.5 (0.8)             | 5.3 (4.3)                   | 0.123   |
| Invasive ventilation                                                   | 2 (1.3)               | 4 (0.7)                     | 0.383*  |
| Pneumonia                                                              | 57 (37.5)             | 133 (23.2)                  | <0.001  |
| Positive blood cultures                                                | 7 (4.6)               | 10 (1.7)                    | 0.045*  |
| Antibiotic used                                                        | 102 (67.1)            | 272 (47.3)                  | <0.001  |
| Hospital all-cause mortality                                           | 5 (3.3)               | 15 (2.6)                    | 0.413   |
| All-cause mortality during hospitalization and 30 days after discharge | 13 (8.6)              | 20 (3.5)                    | 0.010   |
| Time from hospitalization to death (days), mean (SD)                   | 13,4 (15.3)           | 8.1 (12.4)                  | 0.447   |

Continuous variables

(hospital treatment duration, ICU treatment duration, time from hospitalization to death) are presented as mean and standard deviation (SD), categorical variables are presented as number (n) and percent (%). P-values were calculated with two-tailed t-test for continuous variables and with chi-square ( $\chi^2$ ) test and Fisher's exact test for categorical variables.

RSV respiratory syncytial virus, ER emergency room, ICU intensive care unit

\* = calculated with Fischer's Exact Test.

In blood cultures of RSV patients, *Streptococcus pneumoniae* was found among 2 patients. *Klebsiella pneumoniae*, *Prevotella oralis*, *Staphylococcus epidermidis*, *Escherichia coli* and *Streptococcus viridans* were found in the blood cultures of one patient each. In the blood cultures of influenza-infected patients, *Staphylococcus aureus* was found among 3 patients, and *Streptococcus pneumoniae* in 2 patients. Positive blood cultures for *Staphylococcus epidermidis*, *Pseudomonas aeruginosa*, *Streptococcus dysgalactiae subsp. equisimilis* and *Proteus mirabilis* were detected each in one patient. In one patient with influenza, blood cultures were positive, but the pathogen remained unknown.

Altogether, 27 different antibiotics and 591 courses of antibiotics were used during the hospitalizations. In the RSV and influenza infected patients, 47 (30.9%) vs. 154 (26.9%) received a single antibiotic, 44 (28.9%) vs. 87 (15.2%) received two different antibiotics, 8 (5.3%) vs. 24 (4.2%) received 3 different antibiotics and 2 (1.3%) vs. 6 (1.0%) patients received 4 different antibiotics. One (0.2%) patient with influenza infection received 5 different antibiotics during hospitalization.

#### Factors associated with hospitalization and mortality

Crosstabulation of the baseline characteristics affecting all-cause mortality during hospitalization and 30 days after discharge is presented in Table 3. Non-surviving RSV-infected patients had significantly more underlying conditions (3.2 vs. 2.2,  $p=0.016$ ), solid malignancies (23.1% vs. 5.0%,  $p=0.042$ ) and chronic kidney disease (30.8% vs. 5.8%,  $p=0.011$ ) than the survivors. In patients with influenza, underlying heart failure was more common among the non-survivors than the survivors (30.0% vs. 9.8%,  $p=0.012$ ). The non-survivors were also significantly older (83.6 vs. 67.5 years,  $p<0.001$ ) and lived in supported housing more often than the survivors (55.0% vs. 26.0%,  $p=0.004$ ).

**Table 3.** Comparison of the characteristics between RSV-infected non-survivors and survivors and influenza-infected non-survivors and survivors during hospitalization and 30 days after discharge.

|                                                | RSV non-survivors<br>(n=13)<br>n (%) | RSV survivors<br>(n=139)<br>n (%) | p-value | Influenza non-survivors<br>(n=20)<br>n (%) | Influenza survivors<br>(n=553)<br>n (%) | p-value |
|------------------------------------------------|--------------------------------------|-----------------------------------|---------|--------------------------------------------|-----------------------------------------|---------|
| Male                                           | 5 (38.5)                             | 70 (50.4)                         | 0.412   | 9 (45.0)                                   | 253 (45.8)                              | 0.947   |
| Female                                         | 8 (61.5)                             | 69 (49.6)                         |         | 11 (55.0)                                  | 300 (54.2)                              |         |
| Age (years), mean (SD)                         | 77.5 (15.2)                          | 73.0 (15.1)                       | 0.304   | 83.6 (10.0)                                | 67.5 (18.4)                             | <0.001  |
| BMI >30 (kg/m <sup>2</sup> )                   | 2 (15.4)                             | 22 (15.8)                         | 0.623*  | 2 (10.0)                                   | 109 (19.7)                              | 0.435*  |
| BMI <20 (kg/m <sup>2</sup> )                   | 0 (0)                                | 7 (100)                           | 0.502*  | 1 (5.0)                                    | 26 (4.7)                                | 0.511*  |
| Smoking                                        | 2 (15.4)                             | 24 (17.3)                         | 0.598*  | 0 (0)                                      | 89 (16.1)                               | 0.109*  |
| Number of underlying conditions, (n) mean (SD) | 3.2 (1.8)                            | 2.2 (1.3)                         | 0.016   | 2.2 (1.3)                                  | 1.9 (1.5)                               | 0.426   |
| Supported housing                              | 6 (46.2)                             | 44 (31.2)                         | 0.222*  | 11 (55.0)                                  | 144 (26.0)                              | 0.004   |
| Hypertension                                   | 8 (61.5)                             | 84 (60.4)                         | 0.938   | 8 (40.0)                                   | 253 (45.8)                              | 0.612   |
| Ischemic heart disease                         | 7 (53.8)                             | 44 (31.7)                         | 0.097*  | 6 (30.0)                                   | 148 (26.8)                              | 0.460   |
| Heart failure                                  | 4 (30.8)                             | 23 (16.5)                         | 0.179*  | 6 (30.0)                                   | 54 (9.8)                                | 0.012*  |
| Cerebrovascular disease                        | 5 (38.5)                             | 23 (16.5)                         | 0.065*  | 4 (20.0)                                   | 73 (13.2)                               | 0.276*  |
| COPD                                           | 2 (15.4)                             | 18 (12.9)                         | 0.534*  | 1 (5.0)                                    | 56 (10.1)                               | 0.390*  |
| Asthma                                         | 1 (7.7)                              | 38 (27.3)                         | 0.106*  | 6 (30.0)                                   | 129 (23.3)                              | 0.323*  |
| Solid malignancy                               | 3 (23.1)                             | 7 (5.0)                           | 0.042*  | 3 (15.0)                                   | 44 (8.0)                                | 0.221*  |
| Hematological malignancy                       | 1 (7.7)                              | 6 (4.3)                           | 0.472*  | 1 (5.0)                                    | 15 (2.7)                                | 0.438*  |
| Diabetes                                       | 4 (30.8)                             | 30 (21.6)                         | 0.324*  | 3 (15.0)                                   | 119 (21.5)                              | 0.353*  |
| Chronic kidney disease                         | 4 (30.8)                             | 8 (5.8)                           | 0.011*  | 1 (5.0)                                    | 42 (7.6)                                | 0.548*  |
| Dementia                                       | 1 (7.7)                              | 21 (15.1)                         | 0.409*  | 3 (15.0)                                   | 68 (12.3)                               | 0.460*  |
| Immunosuppressive medication                   | 3 (23.1)                             | 8 (5.8)                           | 0.054*  | 2 (10.0)                                   | 63 (11.4)                               | 0.599*  |

In categorical variables, males were compared to females, patients with BMI >30 to patients with BMI ≤30, patients with BMI <20 to patients with BMI ≥20, smokers to non-smokers, patients living in supported housing to patients living independently. The patients with certain underlying condition were compared to those without the underlying condition in question. Continuous variables (age, number of underlying conditions) are presented as mean and standard deviation (SD), categorical variables are presented as number (n) and percent (%). P-values were calculated with two-tailed t-test for continuous variables and with chi-square ( $\chi^2$ ) test and Fisher's exact test among categorical variables.

RSV respiratory syncytial virus, BMI Body mass index, COPD chronic obstructive pulmonary disease

\* = calculated with Fischer's Exact Test.

In multivariable logistic regression analyses among all study patients, RSV infection ( $p=0.012$ ), age ( $p=0.003$ ), smoking ( $p=0.001$ ) and number of underlying conditions ( $p<0.001$ ) were positively associated

with the likelihood of hospitalization (Table 4). RSV infection ( $p=0.029$ ), age ( $p<0.001$ ) and solid malignancies ( $p=0.042$ ) were positively associated with the all-cause mortality during hospitalization and 30 days after discharge (Table 5).

**Table 4:** Univariable and multivariable logistic regression analyses of factors associated with hospitalization among all study population ( $n=725$ ).

|                                 | Crude OR<br>(95% CI) | p-value | Adjusted OR<br>(95% CI) | p-value |
|---------------------------------|----------------------|---------|-------------------------|---------|
| RSV infection                   | 2.751 (1.721-4.398)  | <0.001  | 2.035 (1.167-3.546)     | 0.012   |
| Male gender                     | 0.929 (0.676-1.277)  | 0.650   |                         |         |
| Age (years)                     | 1.032 (1.023-1.042)  | <0.001  | 1.021 (1.007-1.035)     | 0.003   |
| BMI >30                         | 1.290 (0.816-2.039)  | 0.276   |                         |         |
| BMI <20                         | 0.893 (0.415-1.920)  | 0.772   |                         |         |
| Smoking                         | 1.995 (1.189-3.346)  | 0.009   | 2.621 (1.502-4.573)     | 0.001   |
| Number of underlying conditions | 1.611 (1.418-1.830)  | <0.001  | 1.433 (1.210-1.696)     | <0.001  |
| Supported housing               | 1.546 (1.069-2.238)  | 0.021   |                         |         |
| Hypertension                    | 2.864 (2.047-4.007)  | <0.001  |                         |         |
| Ischemic heart disease          | 2.445 (1.641-3.644)  | <0.001  |                         |         |
| Heart failure                   | 3.342 (1.738-6.425)  | <0.001  |                         |         |
| Cerebrovascular disease         | 2.502 (1.449-4.317)  | 0.001   |                         |         |
| COPD                            | 3.190 (1.609-6.325)  | 0.001   |                         |         |
| Asthma                          | 1.323 (0.901-1.942)  | 0.153   |                         |         |
| Solid malignancy                | 1.891 (0.960-3.725)  | 0.065   |                         |         |
| Hematological malignancy        | 0.806 (0.337-1.929)  | 0.628   |                         |         |
| Diabetes                        | 2.310 (1.481-3.602)  | <0.001  |                         |         |
| Chronic kidney disease          | 1.434 (0.754-2.729)  | 0.272   |                         |         |
| Dementia                        | 1.205 (0.739-1.964)  | 0.455   |                         |         |
| Immunosuppressive medication    | 0.814 (0.492-1.346)  | 0.422   |                         |         |

The HL confirmed the goodness of fit for the multivariable model ( $p=0.138$ ). In categorical variables, males were compared to females, patients with BMI >30 to patients with BMI  $\leq$ 30, patients with BMI <20 to patients with BMI  $\geq$ 20, smokers to non-smokers, patients living in supported housing to patients living independently. The patients with certain underlying condition were compared to those without the underlying condition in question.

RSV respiratory syncytial virus, BMI Body mass index, COPD chronic obstructive pulmonary disease

**Table 5:** Univariable and multivariable logistic regression analyses of factors associated with all-cause mortality during hospitalization and 30 days after discharge among all study population (n=725).

|                                 | Crude OR<br>(95% CI) | p-value | Adjusted OR<br>(95% CI) | p-value |
|---------------------------------|----------------------|---------|-------------------------|---------|
| RSV infection                   | 2.586 (1.255-5.327)  | 0.010   | 2.288 (1.089-4.806)     | 0.029   |
| Male gender                     | 1.188 (0.586-2.407)  | 0.633   |                         |         |
| Age (years)                     | 1.065 (1.031-1.100)  | <0.001  | 1.063 (1.029-1.099)     | <0.001  |
| BMI >30 (kg/m <sup>2</sup> )    | 0.702 (0.229-2.155)  | 0.537   |                         |         |
| BMI <20 (kg/m <sup>2</sup> )    | 0.746 (0.097-5.761)  | 0.779   |                         |         |
| Smoking                         | 0.411 (0.094-1.807)  | 0.239   |                         |         |
| Number of underlying conditions | 1.290 (1.037-1.606)  | 0.022   |                         |         |
| Supported housing               | 2.848 (1.410-5.753)  | 0.004   |                         |         |
| Hypertension                    | 0.991 (0.493-1.994)  | 0.981   |                         |         |
| Ischemic heart disease          | 1.693 (0.826-3.470)  | 0.151   |                         |         |
| Heart failure                   | 3.473 (1.593-7.570)  | 0.002   |                         |         |
| Cerebrovascular disease         | 2.328 (1.050-5.160)  | 0.037   |                         |         |
| COPD                            | 0.835 (0.249-2.804)  | 0.771   |                         |         |
| Asthma                          | 0.846 (0.361-1.985)  | 0.701   |                         |         |
| Solid malignancy                | 2.793 (1.103-7.075)  | 0.030   | 2.703 (1.038-7.039)     | 0.042   |
| Hematological malignancy        | 2.061 (0.463-9.187)  | 0.343   |                         |         |
| Diabetes                        | 0.981 (0.418-2.305)  | 0.965   |                         |         |
| Chronic kidney disease          | 2.293 (0.848-6.196)  | 0.102   |                         |         |
| Dementia                        | 0.935 (0.321-2.721)  | 0.901   |                         |         |
| Immunosuppressive medication    | 1.562 (0.585-4.173)  | 0.374   |                         |         |

The HL confirmed the goodness of fit for the multivariable model ( $p=0.607$ ). In categorical variables, males were compared to females, patients with BMI >30 to patients with BMI  $\leq$ 30, patients with BMI <20 to patients with BMI  $\geq$ 20, smokers to non-smokers, patients living in supported housing to patients living independently. The patients with certain underlying condition were compared to those without the underlying condition in question.

RSV respiratory syncytial virus, BMI Body mass index, COPD chronic obstructive pulmonary disease

## Discussion

We examined the number and severity of RSV and influenza infections among adult patients in KUH district in Eastern Finland during the 2017-2018 RSV epidemic season. The majority of the patients in both groups were elderly and had several underlying conditions, but most of them were living independently. However, because of the high general morbidity in population of Eastern Finland, the impact of epidemic RSV and influenza is considerable [22].

Consistent with previous studies, the patients with RSV were older and had significantly more underlying conditions than those with influenza [8,14,15,21], especially high blood pressure and heart failure. Compared to influenza, RSV caused a more serious disease in terms of hospitalization, secondary pneumonia, blood culture positivity, need for antibiotics and supplementary oxygen. In addition, the all-cause mortality during hospitalization and 30 days after discharge was higher among the RSV-infected patients than those with influenza (8.6% vs 3.5%) as found in earlier studies [8,14,15,21]. In multivariate analyses, RSV remained as a significant independent risk factor to hospitalization (aOR 2.0,  $p=0.012$ ) and mortality (aOR 2.3,  $p=0.029$ ) compared to influenza. The majority of the deaths due to influenza infection occurred during hospitalization, whereas the majority of the deaths due to RSV infection occurred within 30 days after discharge. RSV-infected patients in our study were generally older and their burden of diseases was heavier compared to patients with influenza. This may reflect the limited ability of many elderly

1  
2  
3 patients to recover from serious illness and therefore explain the high mortality after discharge from  
4 hospital.  
5

6 Regarding hospital events in RSV-infected patients, the time in hospital treatment (4.5 days vs 4-9 days),  
7 incidence of pneumonia (37,5% vs 31-80%) and positive results in blood cultures (4.6% vs 4%) were in  
8 accordance with other studies [7,8,11,12,13,14,15]. However, hypoxemia and the need of supplementary  
9 oxygen (50.7% vs 53-68%), ICU admission (3.9% vs 10-25%) and the use of invasive ventilation (1.3% vs 10-  
10 36%) were less common in our study [7,8,10,11,13]. Separate Step Down Units (SDUs) are in active use in  
11 our own hospital and this might be one explanation for the low ICU admissions. SDUs provide an  
12 intermediate level of care between ICU and the medical wards. One of these SDUs is located in our  
13 pulmonary unit, where intensive observation, treatment and oxygen support like high nasal flow oxygen  
14 therapy and non-invasive ventilation are available. Especially fragile patients and patients with treatment  
15 limitations e.g., withholding of life-sustaining treatment, are treated in SDUs instead of ICU. Interestingly, a  
16 decision not to initiate or escalate a life-sustaining treatment in terminal illness in accordance with  
17 expressed wishes of the patient or surrogate is a widespread practice in Finland. These decisions are more  
18 common in elderly patients, non-surgical patients and those, who have more comorbidities, malignancy  
19 and cardiovascular or respiratory insufficiency [23]. This description correlates quite nicely to hospitalized  
20 RSV-patients in this paper. The exact number of patients who denied intensive treatment in present study  
21 is not known but they also exist. Despite the differences in treatment compared to earlier studies, in-  
22 hospital mortality rate (3,3%) was generally low and in accordance with earlier studies (1.1%-15.9%)  
23 [7,8,10,11,12].  
24  
25  
26  
27

28 The use of antibiotics among both RSV-infected (67.1%) and influenza-infected (47.3%) patients was  
29 common in our study, but lower than reported earlier among RSV-infected patients (76-95%) [7,8,10].  
30 Among patients with influenza, the proportion of patients treated with prophylactic antibiotics has been  
31 reported to be as high as 96.6% [24]. In our study, the proportion of patients with influenza treated with  
32 antibiotics was significantly lower. In both groups, the proportion of those who received antibiotics was  
33 higher than the amount of actual pneumonia diagnoses. In Finland, the antimicrobial resistance has  
34 remained low compared to other countries in European Union due to strict antimicrobial policy [25]. The  
35 lower usage of antibiotics in our study did not increase the mortality rate in RSV-infected patients  
36 compared to other studies where the use of antibiotics had been studied [7,8,10].  
37  
38  
39

40 The number of deceased patients in our study was low, which is in line with previous studies conducted  
41 with RSV- and influenza-infected patients [7,8,9,10,11,12,13,14]. Solid malignancies and chronic kidney  
42 disease were more common among the RSV-infected non-survivors, who also had more underlying  
43 conditions than the survivors in general. Age and heart failure were more common among non-survivors  
44 than survivors in influenza-infected patients, but not in RSV-infected patients. In earlier studies, older age  
45 has been reported to be a significant factor predicting mortality in RSV-infected patients [8,9,12,13,14]. Age  
46 and previous hematological disease have been reported to be associated with an increased risk of death  
47 during the first 21 days of hospitalization among both RSV- and influenza-infected patients [12]. As far as  
48 we know, our finding that solid malignancies and chronic kidney disease are factors predicting mortality in  
49 RSV infections, has not been reported before.  
50  
51

52 Among all study patients, smoking (aOR 2.621, p=0.001) was positively associated with the increased risk of  
53 hospitalization, but not with mortality. The result is in line with previous studies, where the positive  
54 association with likelihood of hospitalization has been observed, but effect on mortality has been less  
55 conclusive [18]. Unlike reported previously [17], obesity was not associated with the increased risk of  
56 hospitalization among influenza-infected and RSV-infected patients in our study. In current study, 15.8% of  
57 the patients with RSV and 19.8% with influenza were obese (BMI over 30kg/m<sup>2</sup>), while on average in  
58 Finland 26.1% of men and 27.5% of women over 30-years or age are obese [26]. Still, only 12.1% of the  
59  
60



1  
2  
3 deceased patients in our study with influenza or RSV were obese. When compared to COVID-19, the  
4 difference is remarkable, since 28.9% of the deceased patients aged 20 years and older with COVID-19 have  
5 been reported to be obese [27].  
6

7 The study was carried out in a tertiary care hospital, and there was no possibility to gather information  
8 about patient recovery from primary care facilities, which is a limitation. During the study period, there was  
9 a major RSV epidemic in Finland, which explains the high number of RSV infections compared to influenza  
10 infections. During this time, influenza B was more common than influenza A in Finland and total number of  
11 influenza infections was higher than in previous years explained by the high prevalence of influenza B [20].  
12 However, there was no significant difference in excess mortality compared to previous influenza seasons  
13 during the study time [20].  
14  
15

16 In our study RSV infection was associated with increased likelihood of hospitalization and mortality  
17 compared to influenza. The patients with RSV infection were older and had more underlying conditions  
18 than the patients with influenza. No difference in BMI or smoking status was found, but solid malignancies  
19 and chronic kidney disease were shown to be independent risk factors for death among RSV-infected  
20 patients. During RSV and influenza epidemics, it is important to test all hospitalized patients with  
21 respiratory symptoms to prevent the spread of infection by using contact and respiratory precautions as  
22 well as isolation and cohorting of infected patients. The same practices are important in managing COVID-  
23 19 infected patients.  
24  
25  
26  
27  
28

29 **Patient consent for publication:** Not applicable.

30 **Ethics approval:** This study was conducted according to the principles expressed in the Declaration of  
31 Helsinki [28], and it was approved by a local ethics committee (the Research Ethics Committee of the  
32 Northern Savo Hospital District; 1107/13.02.00/2018).  
33  
34

#### 35 **Data availability statement**

36 Due to legal and ethical restrictions, no additional data is available.  
37

38 **Contributors:** **Alexi Hämäläinen:** Conceptualization, Methodology, Validation, Formal analysis,  
39 Investigation, Data Curation, Writing - Original Draft and Reviewing & Editing, Visualization; **Ellamaria**  
40 **Savinainen:** Conceptualization, Validation, Resources, Investigation, Data Curation, Writing - Original Draft  
41 and Reviewing & Editing, Visualization; **Sari Hämäläinen:** Conceptualization, Methodology, Validation,  
42 Formal analysis, Writing - Review & Editing, Visualization; **Katariina Sivenius:** Conceptualization,  
43 Methodology, Validation, Formal analysis, Writing - Review & Editing, Visualization; **Juha Kauppinen:**  
44 Conceptualization, Methodology, Data Curation, Writing - Review & Editing; **Irma Koivula:**  
45 Conceptualization, Methodology, Validation, Writing - Reviewing & Editing, Visualization; **Riitta-Liisa**  
46 **Patovirta:** Conceptualization, Methodology, Writing - Review & Editing, Supervision, Project administration.  
47 All authors approved the final version of the manuscript.  
48  
49  
50

51 **Funding:** This research received no specific grant from any funding agency in the public, commercial or not-  
52 for-profit sectors  
53

54 **Competing interests:** None declared.  
55  
56  
57

#### 58 **References**

59 1. Simoes EA. Respiratory syncytial virus infection. *Lancet* 1999;**354**(9181):847-52.  
60

1  
2  
3  
4  
5  
6  
7  
8  
9  
10  
11  
12  
13  
14  
15  
16  
17  
18  
19  
20  
21  
22  
23  
24  
25  
26  
27  
28  
29  
30  
31  
32  
33  
34  
35  
36  
37  
38  
39  
40  
41  
42  
43  
44  
45  
46  
47  
48  
49  
50  
51  
52  
53  
54  
55  
56  
57  
58  
59  
60

2. Falsey A, Hennessey P, Formica M, *et al.* Respiratory Syncytial Virus Infection in Elderly and High-Risk Adults. *N Engl J Med* 2005;**352**(1), 1749–1759.
3. Tartuntataudit Suomessa 2020, Finnish Institute for Health and Welfare.
4. Li Y, Reeves RM, Wang X, *et al.* Global patterns in monthly activity of influenza virus, respiratory syncytial virus, parainfluenza virus, and metapneumovirus: a systematic analysis. *Lancet Glob Health*. 2019;**7**(8):e1031-e1045.
5. Tin Tin Htar M, Yerramalla MS, Moisi JC, *et al.* The burden of respiratory syncytial virus in adults: a systematic review and meta-analysis. *Epidemiology and Infection* 2020;**148**, E48.
6. Shi T, Denouel A, Tietjen AK, *et al.* Global Disease Burden Estimates of Respiratory Syncytial Virus-Associated Acute Respiratory Infection in Older Adults in 2015: A Systematic Review and Meta-Analysis. *J Infect Dis*. 2020;**222**(Supplement\_7):S577-S583.
7. Chuaychoo B, Ngamwongwan S, Kaewnaphan B., *et al.* Clinical manifestations and outcomes of respiratory syncytial virus infection in adult hospitalized patients. *Journal of Clinical Virology* 2019;**117**: 103–108.
8. Cohen R, Babushkin F, Geller K, *et al.* Characteristics of hospitalized adult patients with laboratory documented Influenza A, B and Respiratory Syncytial Virus – A single center retrospective observational study. *PLoS One* 2019;**14**(3): e0214517.
9. Wyffels V, Kariburyo F, Gavart S, *et al.* A Real-World Analysis of Patient Characteristics and Predictors of Hospitalization Among US Medicare Beneficiaries with Respiratory Syncytial Virus Infection. *Advanced Therapeutics* 2020;**37**(3):1203–1217.
10. Vos LM, Oosterheert JJ, Hoepelman AIM, *et al.* External validation and update of a prognostic model to predict mortality in hospitalized adults with RSV: A retrospective Dutch cohort study. *Journal of Medical Virology* 2019;**91**(12):2117–2124.
11. Yoon JG, Noh JY, Choi WS, *et al.* Clinical characteristics and disease burden of respiratory syncytial virus infection among hospitalized adults. *Scientific Reports* 2020;**10**(1):12106.
12. Prasad N, Newbern EC, Trenholme AA, *et al.* The health and economic burden of respiratory syncytial virus associated hospitalizations in adults. *PLoS ONE* 2020;**15**(6): e0234235.
13. Lee N, Lui GCY, Wong KT, *et al.* High Morbidity and Mortality in Adults Hospitalized for Respiratory Syncytial Virus Infections. *Clinical Infectious Diseases* 2013;**57**(8), 1069–1077.
14. Zhang Y, Wang Y, Zhao J, *et al.* Severity and mortality of respiratory syncytial virus vs influenza A infection in hospitalized adults in China. *Influenza and Other Respiratory Viruses* 2020;**14**(5):483–490.
15. Ackerson B, Tseng HF, Sy LS, *et al.* Severe Morbidity and Mortality Associated With Respiratory Syncytial Virus Versus Influenza Infection in Hospitalized Older Adults. *Clinical Infectious Diseases* 2019;**69**(2):197–203.
16. Loubet P, Lenzi N, Valette M, *et al.* Clinical characteristics and outcome of respiratory syncytial virus infection among adults hospitalized with influenza-like illness in France. *Clinical Microbiology and Infection* 2017;**23**(4), 253–259.
17. Moser JS, Galindo-Fraga A, Ortiz-Hernández AA, *et al.* Underweight, overweight, and obesity as independent risk factors for hospitalization in adults and children from influenza and other respiratory viruses. *Influenza Other Respir Viruses* 2019;**13**(1):3-9.

- 1  
2  
3 18. Han L, Ran J, Mak YW, *et al.* Smoking and Influenza-associated Morbidity and Mortality: A Systematic  
4 Review and Meta-analysis. *Epidemiology* 2019;**30**(3):405-417.  
5  
6 19. Falsey A, Hennessey Patricia A, Formica M, *et al.* Respiratory Syncytial Virus Infection in Elderly and  
7 High-Risk Adults. *N Engl J Med* 2005;**352**(1), 1749–1759.  
8  
9 20. Ikonen N, Murtopuro S, Haveri A, *et al.* Influenssakausi Suomessa, viikot 40/2017-20/2018:  
10 Seurantaraportti. Finland: National Institute for Health and Welfare; 2018.  
11  
12 21. Kwon Y, Park S, Kim M., *et al.* Risk of mortality associated with respiratory syncytial virus and influenza  
13 infection in adults. *BMC Infectious Diseases* 2017;**17**(1), 785.  
14  
15 22. THL's Morbidity Index: [https://thl.fi/en/web/thlfi-en/statistics-and-data/statistics-by-](https://thl.fi/en/web/thlfi-en/statistics-and-data/statistics-by-topic/morbidity/thl-s-morbidity-index)  
16 [topic/morbidity/thl-s-morbidity-index](https://thl.fi/en/web/thlfi-en/statistics-and-data/statistics-by-topic/morbidity/thl-s-morbidity-index). Accessed 4.1.2022.  
17  
18 23. Adamski J, Weigl W, Lahtinen P, *et al.* Intensive care patient survival after limiting life-sustaining  
19 treatment-The FINNEOL\* national cohort study. *Acta Anaesthesiol Scand.* 2020;**64**(8):1144-1153.  
20  
21 24. Manohar P, Loh B, Nachimuthu R, *et al.* Secondary Bacterial Infections in Patients With Viral  
22 Pneumonia. *Front Med (Lausanne)* 2020;**7**:420.  
23  
24 25. European Centre for Disease Prevention and Control. Antimicrobial resistance in the EU/EEA (EARS-Net)  
25 - Annual Epidemiological Report 2019. Stockholm: ECDC; 2020  
26  
27 26. Koponen P, Borodulin K, Lundqvist A, *et al.* Terveys, toimintakyky ja hyvinvointi Suomessa -  
28 FinTerveys2017-tutkimus. Raportti 4/2018. Terveysten ja hyvinvoinnin laitos, Helsinki.  
29  
30 27. Gao M, Piernas C, Astbury NM, *et al.* Associations between body-mass index and COVID-19 severity in  
31 6.9 million people in England: a prospective, community-based, cohort study. *Lancet Diabetes Endocrinol.*  
32 2021;**9**(6):350-359.  
33  
34 28. World Medical Association Declaration of Helsinki: ethical principles for medical research involving  
35 human subjects. *JAMA* 2000;**284**(23):3043-3045.  
36  
37  
38  
39  
40  
41  
42  
43  
44  
45  
46  
47  
48  
49  
50  
51  
52  
53  
54  
55  
56  
57  
58  
59  
60



STROBE Statement—Checklist of items that should be included in reports of *cohort studies*

|                              | Item No | Recommendation                                                                                                                                                                                    | Page No |
|------------------------------|---------|---------------------------------------------------------------------------------------------------------------------------------------------------------------------------------------------------|---------|
| <b>Title and abstract</b>    | 1       | (a) Indicate the study's design with a commonly used term in the title or the abstract<br>(b) Provide in the abstract an informative and balanced summary of what was done and what was found     | 1<br>1  |
| <b>Introduction</b>          |         |                                                                                                                                                                                                   |         |
| Background/rationale         | 2       | Explain the scientific background and rationale for the investigation being reported                                                                                                              | 2       |
| Objectives                   | 3       | State specific objectives, including any prespecified hypotheses                                                                                                                                  | 2       |
| <b>Methods</b>               |         |                                                                                                                                                                                                   |         |
| Study design                 | 4       | Present key elements of study design early in the paper                                                                                                                                           | 3       |
| Setting                      | 5       | Describe the setting, locations, and relevant dates, including periods of recruitment, exposure, follow-up, and data collection                                                                   | 3       |
| Participants                 | 6       | (a) Give the eligibility criteria, and the sources and methods of selection of participants. Describe methods of follow-up                                                                        | 3       |
|                              |         | (b) For matched studies, give matching criteria and number of exposed and unexposed                                                                                                               | 3       |
| Variables                    | 7       | Clearly define all outcomes, exposures, predictors, potential confounders, and effect modifiers. Give diagnostic criteria, if applicable                                                          | 3       |
| Data sources/<br>measurement | 8*      | For each variable of interest, give sources of data and details of methods of assessment (measurement). Describe comparability of assessment methods if there is more than one group              | 3       |
| Bias                         | 9       | Describe any efforts to address potential sources of bias                                                                                                                                         | 3       |
| Study size                   | 10      | Explain how the study size was arrived at                                                                                                                                                         | 3       |
| Quantitative variables       | 11      | Explain how quantitative variables were handled in the analyses. If applicable, describe which groupings were chosen and why                                                                      | 3       |
| Statistical methods          | 12      | (a) Describe all statistical methods, including those used to control for confounding                                                                                                             | 3       |
|                              |         | (b) Describe any methods used to examine subgroups and interactions                                                                                                                               | 3       |
|                              |         | (c) Explain how missing data were addressed                                                                                                                                                       | 4       |
|                              |         | (d) If applicable, explain how loss to follow-up was addressed                                                                                                                                    | -       |
|                              |         | (e) Describe any sensitivity analyses                                                                                                                                                             | 3       |
| <b>Results</b>               |         |                                                                                                                                                                                                   |         |
| Participants                 | 13*     | (a) Report numbers of individuals at each stage of study—eg numbers potentially eligible, examined for eligibility, confirmed eligible, included in the study, completing follow-up, and analysed | 4       |
|                              |         | (b) Give reasons for non-participation at each stage                                                                                                                                              | 4       |
|                              |         | (c) Consider use of a flow diagram                                                                                                                                                                | -       |
| Descriptive data             | 14*     | (a) Give characteristics of study participants (eg demographic, clinical, social) and information on exposures and potential confounders                                                          | 4       |
|                              |         | (b) Indicate number of participants with missing data for each variable of interest                                                                                                               | -       |
|                              |         | (c) Summarise follow-up time (eg, average and total amount)                                                                                                                                       | 4       |
| Outcome data                 | 15*     | Report numbers of outcome events or summary measures over time                                                                                                                                    | 4-7     |

|    |                          |    |                                                                                                                                                                                                              |      |
|----|--------------------------|----|--------------------------------------------------------------------------------------------------------------------------------------------------------------------------------------------------------------|------|
| 1  | Main results             | 16 | (a) Give unadjusted estimates and, if applicable, confounder-adjusted estimates and their precision (eg, 95% confidence interval). Make clear which confounders were adjusted for and why they were included | 7-8  |
| 2  |                          |    | (b) Report category boundaries when continuous variables were categorized                                                                                                                                    | 4-8  |
| 3  |                          |    | (c) If relevant, consider translating estimates of relative risk into absolute risk for a meaningful time period                                                                                             | -    |
| 4  |                          |    |                                                                                                                                                                                                              |      |
| 5  | Other analyses           | 17 | Report other analyses done—eg analyses of subgroups and interactions, and sensitivity analyses                                                                                                               | -    |
| 6  |                          |    |                                                                                                                                                                                                              |      |
| 7  |                          |    |                                                                                                                                                                                                              |      |
| 8  |                          |    |                                                                                                                                                                                                              |      |
| 9  |                          |    |                                                                                                                                                                                                              |      |
| 10 |                          |    |                                                                                                                                                                                                              |      |
| 11 | <b>Discussion</b>        |    |                                                                                                                                                                                                              |      |
| 12 | Key results              | 18 | Summarise key results with reference to study objectives                                                                                                                                                     | 8-9  |
| 13 | Limitations              | 19 | Discuss limitations of the study, taking into account sources of potential bias or imprecision. Discuss both direction and magnitude of any potential bias                                                   | 10   |
| 14 |                          |    |                                                                                                                                                                                                              |      |
| 15 | Interpretation           | 20 | Give a cautious overall interpretation of results considering objectives, limitations, multiplicity of analyses, results from similar studies, and other relevant evidence                                   | 8-10 |
| 16 |                          |    |                                                                                                                                                                                                              |      |
| 17 | Generalisability         | 21 | Discuss the generalisability (external validity) of the study results                                                                                                                                        | 9    |
| 18 |                          |    |                                                                                                                                                                                                              |      |
| 19 |                          |    |                                                                                                                                                                                                              |      |
| 20 |                          |    |                                                                                                                                                                                                              |      |
| 21 | <b>Other information</b> |    |                                                                                                                                                                                                              |      |
| 22 | Funding                  | 22 | Give the source of funding and the role of the funders for the present study and, if applicable, for the original study on which the present article is based                                                | 10   |
| 23 |                          |    |                                                                                                                                                                                                              |      |
| 24 |                          |    |                                                                                                                                                                                                              |      |

\*Give information separately for exposed and unexposed groups.

**Note:** An Explanation and Elaboration article discusses each checklist item and gives methodological background and published examples of transparent reporting. The STROBE checklist is best used in conjunction with this article (freely available on the Web sites of PLoS Medicine at <http://www.plosmedicine.org/>, Annals of Internal Medicine at <http://www.annals.org/>, and Epidemiology at <http://www.epidem.com/>). Information on the STROBE Initiative is available at <http://www.strobe-statement.org>.

# BMJ Open

## The disease burden caused by respiratory syncytial virus compared to influenza among adults: a retrospective cohort study from Eastern Finland in 2017-2018.

|                                 |                                                                                                                                                                                                                                                                                                                                                                                                                                                                 |
|---------------------------------|-----------------------------------------------------------------------------------------------------------------------------------------------------------------------------------------------------------------------------------------------------------------------------------------------------------------------------------------------------------------------------------------------------------------------------------------------------------------|
| Journal:                        | <i>BMJ Open</i>                                                                                                                                                                                                                                                                                                                                                                                                                                                 |
| Manuscript ID                   | bmjopen-2022-060805.R1                                                                                                                                                                                                                                                                                                                                                                                                                                          |
| Article Type:                   | Original research                                                                                                                                                                                                                                                                                                                                                                                                                                               |
| Date Submitted by the Author:   | 28-Nov-2022                                                                                                                                                                                                                                                                                                                                                                                                                                                     |
| Complete List of Authors:       | Hämäläinen, Aleks; University of Eastern Finland Institute of Clinical Medicine; Kuopio University Hospital<br>Savinainen, Ellamaria; University of Eastern Finland Institute of Clinical Medicine; Kuopio University Hospital<br>Hämäläinen, Sari; Kuopio University Hospital<br>Sivenius, Katariina; Kuopio University Hospital<br>Kauppinen, Juha; ISLAB<br>Koivula, Irma; Kuopio University Hospital<br>Patovirta, Riitta-Liisa; Kuopio University Hospital |
| <b>Primary Subject Heading</b>: | Infectious diseases                                                                                                                                                                                                                                                                                                                                                                                                                                             |
| Secondary Subject Heading:      | Respiratory medicine, Epidemiology                                                                                                                                                                                                                                                                                                                                                                                                                              |
| Keywords:                       | Respiratory infections < THORACIC MEDICINE, Epidemiology < INFECTIOUS DISEASES, Infection control < INFECTIOUS DISEASES                                                                                                                                                                                                                                                                                                                                         |
|                                 |                                                                                                                                                                                                                                                                                                                                                                                                                                                                 |

SCHOLARONE™  
Manuscripts



I, the Submitting Author has the right to grant and does grant on behalf of all authors of the Work (as defined in the below author licence), an exclusive licence and/or a non-exclusive licence for contributions from authors who are: i) UK Crown employees; ii) where BMJ has agreed a CC-BY licence shall apply, and/or iii) in accordance with the terms applicable for US Federal Government officers or employees acting as part of their official duties; on a worldwide, perpetual, irrevocable, royalty-free basis to BMJ Publishing Group Ltd ("BMJ") its licensees and where the relevant Journal is co-owned by BMJ to the co-owners of the Journal, to publish the Work in this journal and any other BMJ products and to exploit all rights, as set out in our [licence](#).

The Submitting Author accepts and understands that any supply made under these terms is made by BMJ to the Submitting Author unless you are acting as an employee on behalf of your employer or a postgraduate student of an affiliated institution which is paying any applicable article publishing charge ("APC") for Open Access articles. Where the Submitting Author wishes to make the Work available on an Open Access basis (and intends to pay the relevant APC), the terms of reuse of such Open Access shall be governed by a Creative Commons licence – details of these licences and which [Creative Commons](#) licence will apply to this Work are set out in our licence referred to above.

Other than as permitted in any relevant BMJ Author's Self Archiving Policies, I confirm this Work has not been accepted for publication elsewhere, is not being considered for publication elsewhere and does not duplicate material already published. I confirm all authors consent to publication of this Work and authorise the granting of this licence.

**Title:** The disease burden caused by respiratory syncytial virus compared to influenza among adults: a retrospective cohort study from Eastern Finland in 2017-2018.

**Authors:** Aleksi Hämäläinen<sup>1,2</sup>, Ellamaria Savinainen<sup>1,2</sup>, Sari Hämäläinen<sup>2</sup>, Katariina Sivenius<sup>2</sup>, Juha Kauppinen<sup>3</sup>, Irma Koivula<sup>2</sup>, Riitta-Liisa Patovirta<sup>2</sup>

### Affiliations

<sup>1</sup> University of Eastern Finland Institute of Clinical Medicine, Kuopio, Pohjois-Savo, FI

<sup>2</sup> Department of Medicine, Kuopio University Hospital, Kuopio, Pohjois-Savo, FI

<sup>3</sup> Eastern Finland Laboratory Centre Joint Authority Enterprise (ISLAB), Kuopio, Pohjois-Savo, FI

### Corresponding author:

Aleksis Hämäläinen

Department of Medicine, Kuopio University Hospital, Kuopio, Pohjois-Savo, FI

Yliopistonranta 1, 70210 Kuopio

E-mail: [aleh@student.uef.fi](mailto:aleh@student.uef.fi)

Phone number: +358405496077

**Word count:** 3157

**Keywords:** Respiratory infections; Epidemiology; Infection control

### Abstract

**Objectives:** Respiratory syncytial virus (RSV) is one of the most important causes of lower respiratory tract illnesses. In this study, we examined the number and severity of RSV infections among adult patients. The underlying diseases and background information of patients with RSV were examined and compared to the patients with influenza.

**Design:** Retrospective cohort study.

**Setting:** Patients receiving tertiary care services in Kuopio University Hospital (KUH) district in Eastern Finland.

**Participants:** 725 patients (152 with RSV infection and 573 with influenza) treated in KUH between November 2017 and May 2018.

**Primary and secondary outcome measures:** Hospitalization and mortality.

**Results:** Compared to influenza, RSV caused a more serious disease in terms of hospitalization (84.2% vs. 66.0%,  $p < 0.001$ ), incidence of pneumonia (37.5% vs. 23.2%,  $p < 0.001$ ), need for antibiotics (67.1% vs. 47.3%,  $p < 0.001$ ) and supplementary oxygen (50.7% vs. 31.2%,  $p < 0.001$ ). The all-cause mortality during hospitalization and 30 days after discharge was higher among the RSV-infected patients (8.6% vs. 3.5%,  $p = 0.010$ ). Solid malignancies (23.1% vs. 5.0%,  $p = 0.042$ ) and chronic kidney disease (30.8% vs. 5.8%,  $p = 0.011$ ) were more common among the RSV-infected non-survivors compared to survivors. RSV was an

independent risk factor for hospitalization (aOR 2.035; 95% CI 1.17 to 3.55) and mortality (aOR 2.288; 95% CI 1.09 to 4.81) compared to influenza.

**Conclusions:** Among all the screened patients, those with RSV infection were older and had more underlying conditions than patients with influenza. They had increased likelihood of hospitalization and mortality when compared to influenza. Solid malignancies and chronic kidney disease seemed to be independent risk factors for death among RSV-infected patients. During RSV and influenza epidemics, it is important to test patients with respiratory symptoms for RSV and influenza to prevent the spread of the infections among elderly and chronically ill patients.

### Strengths and limitations of this study

- Respiratory syncytial virus (RSV) is one of the most important causes of lower respiratory tract illnesses.
- RSV has been discovered to cause mortality equal or close to the mortality related to influenza among elderly patients.
- This retrospective cohort study compares the effects of multiple background factors on clinical outcomes in RSV- and influenza-infected adult patients.
- The major limitation of the study was that there was no possibility to gather information about patient recovery from primary care facilities.
- During the study, there was a major RSV epidemic in Finland explaining the high number of RSV infections compared to influenza.

### Introduction

Respiratory syncytial virus (RSV) is one of the most important causes of lower respiratory tract illnesses [1]. RSV bronchitis or pneumonia can lead to hospitalization and even death, especially in elderly people with underlying conditions [2]. A major RSV epidemic is observed in Finland every other winter, often starting in November-December. In addition, minor epidemics occur between the major ones [3,4].

In adults  $\geq 50$  years of age, RSV is responsible for 1-10% of acute respiratory tract infections [5]. RSV hospitalization rates in adults  $\geq 65$  years of age are estimated to be 1/1000 and 0.3/1000 person-years in industrialized and developing countries, respectively [6]. The mortality rate among the elderly patients treated in hospital due to RSV infection varies between 1.1-15.9% [7,8,9,10,11,12] and the 30-day all-cause mortality rate varies between 3.2-13.7% [9,10,12,13,14].

Among elderly patients living in long-term care facilities, RSV is estimated to cause 7.2-11.4% of the hospitalizations among patients with chronic pulmonary diseases [2]. The hospitalized patients with RSV infection and influenza-like symptoms have often immunosuppressive medication, hematological malignancy, or other malignancy [15,16]. In immunocompromised patients, RSV is reported to account for 2.8-10.3% of all acute respiratory tract infections, and 8.6-20.0% of all respiratory viral infections [5]. 30-70% of the patients admitted to hospital because of RSV have cardiovascular disease [7,9,14,15]. During hospitalization, 14-25% of the patients with RSV infection experience a cardiovascular complication such as worsening heart failure, myocardial infarction, or stroke [7,8,13]. Adults that are obese are more likely to be hospitalized from RSV infection and influenza than normal-weight adults [17]. Smoking is associated with higher risk of hospital admissions after influenza infection [18].

1  
2  
3 Among adult patients hospitalized because of RSV infection, hypoxemia is reported in 53-68% and  
4 pneumonia in 31-80% of the patients [7,8,11,13,14,15,16]. Empiric antibiotics are used on 76-95% of the  
5 patients [7,8,10], and blood cultures are positive in 4% of the patients [8]. 10-25% of the RSV-infected  
6 hospitalized adults require treatment in intensive care unit (ICU) [10,11,16] and mechanical ventilation is  
7 needed for 10-36% of the patients [7,8,10]. The average duration of hospitalization has been reported to  
8 range from 4 to 9 days [8,10,12,13,16].  
9

10  
11 When compared to the prevalence of influenza, the prevalence of RSV has been estimated to be up to  
12 twice as high among patients at risk and over 65 years [19]. In Finland, seasonal influenza has been  
13 estimated to cause 500-1000 excess deaths annually [20]. The patients hospitalized due to RSV are older,  
14 have more chronic diseases and are more likely living in long-term care compared to influenza [8,14,15,21].  
15 Among elderly patients aged over 65 years, the in-hospital mortality related to RSV has been estimated to  
16 be equal or close to the mortality related to influenza [5,15]. However, the 30-day mortality rate has been  
17 estimated to be higher among RSV-infected patients [14]. The patients with RSV infection have more often  
18 underlying lung diseases, need more often supplemental oxygen and ventilatory support, and develop  
19 more complications, such as pneumonia, than the patients with influenza [8,13,14,15].  
20  
21  
22  
23

## 24 **Objectives**

25  
26 The aim of the study was to examine the number and severity of RSV infections among adult patients in  
27 Kuopio University Hospital district in Eastern Finland during the RSV epidemic. We also examined the  
28 underlying diseases and background information of patients with RSV. The results were compared to  
29 patients with influenza. The population in the study area has more underlying diseases than the average  
30 Finnish population, and therefore we focused on the disease burden in the outcomes of patients with RSV  
31 [22].  
32  
33  
34  
35

## 36 **Methods**

### 37 Study subjects

38  
39 This retrospective cohort study was carried out in Kuopio University Hospital (KUH). KUH is one of Finland's  
40 five university hospitals. The hospital is a 600-bed teaching hospital that provides tertiary care services to  
41 approximately 800,000 citizens in Central and Eastern Finland. Patients treated in KUH due to influenza and  
42 RSV were identified retrospectively from the information-management system of Eastern Finland  
43 Laboratory Centre (ISLAB) between November 2017 and May 2018. During the study time, there was a  
44 major RSV epidemic in Finland [3]. Patients under 18-years of age and patients with mixed infections  
45 (influenza and RSV) were excluded from the study. Also, patients from regional hospitals were excluded if  
46 there was a lack of availability of electronic medical records.  
47  
48  
49

### 50 Data collection

51  
52 We collected clinical data by using electronic medical records. For general characteristics and background  
53 information we observed age, body mass index (BMI, kg/m<sup>2</sup>), gender, smoking status, type of housing and  
54 underlying conditions. All underlying conditions were classified according to the 2021 ICD-10-CM codes:  
55 hypertension (ICD-10-CM I10-I15), ischemic heart disease (ICD-10-CM I20-I25), heart failure (ICD-10-CM  
56 I50), cerebrovascular disease (ICD-10-CM I60-70), COPD (ICD-10-CM J44), asthma (ICD-10-CM J45), solid  
57 malignancy (ICD-10-CM C00-C80), hematological malignancy (ICD-10-CM C81-C96), diabetes (ICD-10-CM  
58 E08-E13), chronic kidney disease (ICD-10-CM N18) and dementia (ICD-10-CM F00-F03). In addition, the  
59  
60



1  
2  
3 patients with immunosuppressive medication due to other diseases were identified. Type of housing was  
4 divided into living independently and living with daily support (nursing homes, home care). Patients with  
5 BMI greater than or equal to 30 kg/m<sup>2</sup> were defined as obese and patients with BMI under 18.5 kg/m<sup>2</sup>  
6 were defined as underweight [23]. Smoking status was divided into smokers and non-smokers. The  
7 requirement and duration of hospitalization, requirement of supplemental oxygen and non-invasive  
8 ventilation support (bilevel positive airway pressure, continuous positive airway pressure or nasal high  
9 flow), requirement of treatment in ICU and duration of ICU care, requirement of invasive ventilation, blood  
10 culture sample results, use of antibiotics, prevalence of pneumonia, all-cause mortality during  
11 hospitalization and during the following 30 days after discharge were documented. The diagnosis of  
12 pneumonia was made by treating physicians based on clinical status, laboratory tests and X-rays.  
13  
14

#### 15 Laboratory methods

16  
17 The nasopharyngeal samples of influenza and RSV were taken from the patients during hospital visits. The  
18 samples were stored in Copan UTM-RT tubes for transport. The fresh samples were analyzed with multiplex  
19 polymerase chain reaction assay for detecting influenza A and B virus and respiratory syncytial virus nucleic  
20 acids in respiratory tract specimens (Xpert Xpress FLU/RSV test, Cepheid) according to the manufacturer's  
21 instructions in the clinical microbiology laboratory of KUH (Eastern Finland Laboratory Centre Joint  
22 Authority Enterprise, ISLAB).  
23  
24

#### 25 Analyses

26  
27 Data was collected from electronic medical records into an SPSS file and the data analysis was completed  
28 using SPSS version 25 (IBM Corp. Released 2017. IBM SPSS Statistics for Windows, Version 25.0. Armonk,  
29 NY: IBM Corp.). Mean, median and interquartile range (IQR: 25th - 75th percentile) were summarized using  
30 descriptive statistics. The statistical analyses between categorical variables were done by using the chi-  
31 square ( $\chi^2$ ) test. The Fisher's exact test was used instead of chi-square test when analyzing categorical  
32 variables, if any cells had low (<5) minimum expected count. Mann-Whitney U test was used for the  
33 comparison between continuous variables. Univariate and multivariable logistic regression analyses were  
34 used to calculate the crude odds ratios and adjusted odds ratios (aORs) of the factors associated with  
35 hospitalization and all-cause mortality during hospitalization and 30 days after discharge. In the  
36 multivariable model, only the variables with a p value <.100 at univariate analysis were included, and the  
37 final model was built using a stepwise forward procedure to calculate the adjusted odds ratios (aORs). The  
38 Hosmer-Lemeshow (HL) test was used for goodness of fit for logistic regression models. The results with a  
39 p-value lower than 0.05 were counted statistically significant.  
40  
41  
42  
43

#### 44 Patient and public involvement

45  
46 Patients and/or the public were not involved in the design, or conduct, or reporting, or dissemination plans  
47 of this research.  
48  
49

## 50 **Results**

#### 51 Study population

52  
53 In total, 2484 patients with positive screening test results for influenza and RSV were identified at ISLAB  
54 between November 2017 and May 2018. Patients under 18-years of age, patients without electronic  
55 medical record available and patients with mixed infections (influenza and RSV, n=6) were excluded from  
56 the study. After this, total of 725 patients (152 with RSV infection and 573 with influenza infection) were  
57 included in the study. BMI was available on 99 (65.1%) of the RSV-infected patients and on 396 (69.1%) of  
58  
59  
60



the influenza-infected patients. Smoking status was available on 115 (75.7%) of the RSV-infected patients and on 412 (71.9%) of the influenza-infected patients. Other characteristics and all hospital events were available on all patients in the electronic medical record.

### Characteristics

The characteristics of the study population are presented in Table 1. The RSV-infected patients were significantly older than the influenza-infected patients (mean 73.3 vs. 68.1, median 73 vs. 71 years,  $p=0.002$ ). They were also more likely to have diagnoses of hypertension (60.5% vs. 45.5%,  $p=0.001$ ) and heart failure (17.8% vs. 10.5%,  $p=0.014$ ) than the patients with influenza infection. There were no significant differences in gender, smoking status, housing status or other underlying conditions between patients with influenza and RSV infections, but the patients with RSV infection had more underlying conditions (mean 2.32 vs. 1.93, median 2 vs. 2 underlying conditions,  $p=0.003$ ) than those with influenza infection.

**Table 1.** Characteristics of the study population.

|                                 | RSV<br>n=152<br>n (%) | Influenza<br>n=573<br>n (%) | P-value |
|---------------------------------|-----------------------|-----------------------------|---------|
| Male                            | 75 (49.3)             | 262 (45.7)                  | 0.427   |
| Age (years)                     |                       |                             |         |
| Range                           | 23-96                 | 18-100                      |         |
| Mean (SD)                       | 73.3 (15.1)           | 68.1 (18.4)                 | 0.002   |
| Median (IQR)                    | 73 (65-86)            | 71 (59-82)                  |         |
| BMI (kg/m <sup>2</sup> )        |                       |                             |         |
| Range                           | 15.4-43.2             | 14.9-51.2                   |         |
| Mean (SD)                       | 27.0 (5.7)            | 27.3 (5.7)                  | 0.297   |
| Median (IQR)                    | 25.6 (22.9-29.2)      | 27.0 (23.4-30.8)            |         |
| Smoking status                  |                       |                             |         |
| Smoking                         | 26 (17.1)             | 89 (15.5)                   | 0.454   |
| Non-smoker                      | 89 (58.6)             | 323 (56.4)                  |         |
| Housing status                  |                       |                             |         |
| Independent                     | 102 (67.1)            | 418 (72.9)                  | 0.155   |
| Supported                       | 50 (32.9)             | 155 (27.1)                  |         |
| Number of underlying conditions |                       |                             |         |
| Range                           | 0-6                   | 0-7                         |         |
| Mean (SD)                       | 2.32 (1.4)            | 1.93 (1.5)                  | 0.003   |
| Median (IQR)                    | 2 (1-3)               | 2 (1-3)                     |         |
| Hypertension                    | 92 (60.5)             | 261 (45.5)                  | 0.001   |
| Ischemic heart disease          | 51 (33.6)             | 154 (26.9)                  | 0.104   |
| Heart failure                   | 27 (17.8)             | 60 (10.5)                   | 0.014   |
| Cerebrovascular disease         | 28 (18.4)             | 77 (13.4)                   | 0.121   |
| COPD                            | 20 (13.2)             | 57 (9.9)                    | 0.253   |
| Asthma                          | 39 (25.7)             | 135 (23.6)                  | 0.590   |
| Solid malignancy                | 10 (6.6)              | 47 (8.2)                    | 0.509   |
| Hematological malignancy        | 7 (4.6)               | 16 (2.8)                    | 0.257*  |
| Diabetes                        | 34 (22.4)             | 122 (21.3)                  | 0.774   |
| Chronic kidney disease          | 12 (7.9)              | 43 (7.5)                    | 0.872   |
| Dementia                        | 22 (14.5)             | 71 (12.4)                   | 0.495   |
| Immunosuppressive medication    | 11 (7.2)              | 65 (11.3)                   | 0.142   |

Continuous variables (age, BMI, number of underlying conditions) are presented as mean and standard deviation (SD) and median and interquartile range (IQR: 25th - 75th percentile), categorical variables are presented as number (n) and percent (%). P-values were calculated with Mann-Whitney U test for continuous variables and with chi-square ( $\chi^2$ ) test and Fisher's exact test for categorical variables.

RSV respiratory syncytial virus, BMI body mass index, COPD chronic obstructive pulmonary disease

\* = calculated with Fischer's Exact Test.

### Hospitalization

The hospital events of the study population are presented in Table 2. The patients with RSV infection were hospitalized more often than those with influenza (84.2% vs. 66.0%,  $p < 0.001$ ). During hospitalization, the RSV-infected patients needed supplementary oxygen (50.7% vs. 31.2%,  $p < 0.001$ ) and developed pneumonia (37.5% vs. 23.2%,  $p < 0.001$ ) more often than patients with influenza. There was no difference in ICU admission between the groups, but the duration of the treatment in the ICU was longer in influenza-infected patients than those with RSV (mean 5.3 vs. 2.5, median 4 vs. 3 days,  $p = 0.016$ ). Blood culture positivity was detected more often (4.6% vs. 1.7%,  $p = 0.045$ ) and antibiotics were used more often (67.1% vs. 47.3%,  $p < 0.001$ ) among patients with RSV than those with influenza. The all-cause mortality during hospitalization and 30 days after discharge was higher among RSV-infected patients than among those infected by influenza (8.6% vs. 3.5%,  $p = 0.010$ ). There was no significant difference in the in-hospital all-cause mortality between the two groups.

**Table 2.** Outcomes and hospital events of the study population.

|                                                                        | RSV<br>n=152<br>n (%) | Influenza<br>n=573<br>n (%) | P-value |
|------------------------------------------------------------------------|-----------------------|-----------------------------|---------|
| Hospitalized                                                           | 128 (84.2)            | 378 (66.0)                  | <0.001  |
| Discharged from ER                                                     | 24 (15.8)             | 195 (34.0)                  |         |
| Hospital treatment (days)                                              |                       |                             |         |
| Range                                                                  | 1-40                  | 1-66                        |         |
| Mean (SD)                                                              | 4.5 (4.5)             | 4.1 (5.7)                   | 0.425   |
| Median (IQR)                                                           | 5 (3-6)               | 5 (3-7)                     |         |
| Need of supplementary oxygen                                           | 77 (50.7)             | 179 (31.2)                  | <0.001  |
| Non-invasive ventilation                                               | 17 (11.2)             | 50 (8.7)                    | 0.352   |
| ICU admission                                                          | 6 (3.9)               | 23 (4.0)                    | 0.970   |
| ICU treatment duration (days)                                          |                       |                             |         |
| Range                                                                  | 1-3                   | 1-21                        |         |
| Mean (SD)                                                              | 2.5 (0.8)             | 5.3 (4.3)                   | 0.016   |
| Median (IQR)                                                           | 3 (2-3)               | 4 (3-6)                     |         |
| Invasive ventilation                                                   | 2 (1.3)               | 4 (0.7)                     | 0.383*  |
| Pneumonia                                                              | 57 (37.5)             | 133 (23.2)                  | <0.001  |
| Positive blood cultures                                                | 7 (4.6)               | 10 (1.7)                    | 0.045*  |
| Antibiotic used                                                        | 102 (67.1)            | 272 (47.3)                  | <0.001  |
| Hospital all-cause mortality                                           | 5 (3.3)               | 15 (2.6)                    | 0.413   |
| All-cause mortality during hospitalization and 30 days after discharge | 13 (8.6)              | 20 (3.5)                    | 0.010   |
| Time from hospitalization to death (days)                              |                       |                             |         |
| Range                                                                  | 3-40                  | 1-51                        |         |
| Mean (SD)                                                              | 13.4 (15.3)           | 8.1 (12.4)                  | 0.266   |
| Median (IQR)                                                           | 6 (4-27)              | 4 (2-9)                     |         |

Continuous

variables (hospital treatment duration, ICU treatment duration, time from hospitalization to death) are presented as mean and standard deviation (SD) and median and interquartile range (IQR: 25th - 75th percentile), categorical variables are presented as number (n) and percent (%). P-values were calculated with Mann-Whitney U test for continuous variables and with chi-square ( $\chi^2$ ) test and Fisher's exact test for categorical variables.

1  
2  
3 RSV respiratory syncytial virus, ER emergency room, ICU intensive care unit  
4

5 \* = calculated with Fischer's Exact Test.  
6  
7

8 In blood cultures of RSV patients, *Streptococcus pneumoniae* was found among 2 patients. *Klebsiella*  
9 *pneumoniae*, *Prevotella oralis*, *Staphylococcus epidermidis*, *Escherichia coli* and *Streptococcus viridans* were  
10 found in the blood cultures of one patient each. In the blood cultures of influenza-infected patients,  
11 *Staphylococcus aureus* was found among 3 patients, and *Streptococcus pneumoniae* in 2 patients. Positive  
12 blood cultures for *Staphylococcus epidermidis*, *Pseudomonas aeruginosa*, *Streptococcus dysgalactiae subsp.*  
13 *equisimilis* and *Proteus mirabilis* were detected each in one patient. In one patient with influenza, blood  
14 cultures were positive, but the pathogen remained unknown.  
15  
16

17 Altogether, 27 different antibiotics and 591 courses of antibiotics were used during the hospitalizations. In  
18 the RSV and influenza infected patients, 47 (30.9%) vs. 154 (26.9%) received a single antibiotic, 44 (28.9%)  
19 vs. 87 (15.2%) received two different antibiotics, 8 (5.3%) vs. 24 (4.2%) received 3 different antibiotics and 2  
20 (1.3%) vs. 6 (1.0%) patients received 4 different antibiotics. One (0.2%) patient with influenza infection  
21 received 5 different antibiotics during hospitalization.  
22  
23

#### 24 Factors associated with hospitalization and mortality

25  
26 Cross-tabulation of the baseline characteristics affecting all-cause mortality during hospitalization and 30  
27 days after discharge is presented in Table 3. Non-surviving RSV-infected patients had significantly more  
28 often solid malignancies (23.1% vs. 5.0%,  $p=0.042$ ) and chronic kidney disease (30.8% vs. 5.8%,  $p=0.011$ )  
29 than the survivors. In patients with influenza, underlying heart failure was more common among the non-  
30 survivors than the survivors (30.0% vs. 9.8%,  $p=0.012$ ). The non-survivors were also significantly older  
31 (mean 83.6 vs. 67.5, median 83 vs. 70 years,  $p<0.001$ ) and lived in supported housing more often than the  
32 survivors (55.0% vs. 26.0%,  $p=0.004$ ).  
33  
34  
35  
36  
37  
38  
39  
40  
41  
42  
43  
44  
45  
46  
47  
48  
49  
50  
51  
52  
53  
54  
55  
56  
57  
58  
59  
60

**Table 3.** Comparison of the characteristics between RSV-infected non-survivors and survivors and influenza-infected non-survivors and survivors during hospitalization and 30 days after discharge.

|                                 | RSV non-survivors<br>(n=13)<br>n (%) | RSV survivors<br>(n=139)<br>n (%) | p-value | Influenza non-survivors<br>(n=20)<br>n (%) | Influenza survivors<br>(n=553)<br>n (%) | p-value |
|---------------------------------|--------------------------------------|-----------------------------------|---------|--------------------------------------------|-----------------------------------------|---------|
| Male                            | 5 (38.5)                             | 70 (50.4)                         | 0.412   | 9 (45.0)                                   | 253 (45.8)                              | 0.947   |
| Female                          | 8 (61.5)                             | 69 (49.6)                         |         | 11 (55.0)                                  | 300 (54.2)                              |         |
| Age (years)                     |                                      |                                   |         |                                            |                                         |         |
| Range                           | 39-94                                | 23-96                             |         | 68-100                                     | 18-98                                   |         |
| Mean (SD)                       | 77.5 (15.2)                          | 73.0 (15.1)                       | 0.195   | 83.6 (10.0)                                | 67.5 (18.4)                             | <0.001  |
| Median (IQR)                    | 81 (70-90)                           | 73 (64-86)                        |         | 83 (77-93)                                 | 70 (59-82)                              |         |
| Obesity                         | 2 (15.4)                             | 23 (16.5)                         | 0.648*  | 2 (10.0)                                   | 111 (20.1)                              | 0.308*  |
| Underweight                     | 0 (0)                                | 4 (2.9)                           | 0.708*  | 0 (0)                                      | 20 (3.6)                                | 0.512*  |
| Smoking                         | 2 (15.4)                             | 24 (17.3)                         | 0.598*  | 0 (0)                                      | 89 (16.1)                               | 0.109*  |
| Number of underlying conditions |                                      |                                   |         |                                            |                                         |         |
| Range                           | 1-6                                  | 0-6                               |         | 0-5                                        | 0-7                                     |         |
| Mean (SD)                       | 3.2 (1.8)                            | 2.2 (1.3)                         | 0.059   | 2.2 (1.3)                                  | 1.9 (1.5)                               | 0.291   |
| Median (IQR)                    | 3 (2-5)                              | 2 (1-3)                           |         | 2 (1-3)                                    | 2 (1-3)                                 |         |
| Supported housing               | 6 (46.2)                             | 44 (31.2)                         | 0.222*  | 11 (55.0)                                  | 144 (26.0)                              | 0.004   |
| Hypertension                    | 8 (61.5)                             | 84 (60.4)                         | 0.938   | 8 (40.0)                                   | 253 (45.8)                              | 0.612   |
| Ischemic heart disease          | 7 (53.8)                             | 44 (31.7)                         | 0.097*  | 6 (30.0)                                   | 148 (26.8)                              | 0.460   |
| Heart failure                   | 4 (30.8)                             | 23 (16.5)                         | 0.179*  | 6 (30.0)                                   | 54 (9.8)                                | 0.012*  |
| Cerebrovascular disease         | 5 (38.5)                             | 23 (16.5)                         | 0.065*  | 4 (20.0)                                   | 73 (13.2)                               | 0.276*  |
| COPD                            | 2 (15.4)                             | 18 (12.9)                         | 0.534*  | 1 (5.0)                                    | 56 (10.1)                               | 0.390*  |
| Asthma                          | 1 (7.7)                              | 38 (27.3)                         | 0.106*  | 6 (30.0)                                   | 129 (23.3)                              | 0.323*  |
| Solid malignancy                | 3 (23.1)                             | 7 (5.0)                           | 0.042*  | 3 (15.0)                                   | 44 (8.0)                                | 0.221*  |
| Hematological malignancy        | 1 (7.7)                              | 6 (4.3)                           | 0.472*  | 1 (5.0)                                    | 15 (2.7)                                | 0.438*  |
| Diabetes                        | 4 (30.8)                             | 30 (21.6)                         | 0.324*  | 3 (15.0)                                   | 119 (21.5)                              | 0.353*  |
| Chronic kidney disease          | 4 (30.8)                             | 8 (5.8)                           | 0.011*  | 1 (5.0)                                    | 42 (7.6)                                | 0.548*  |
| Dementia                        | 1 (7.7)                              | 21 (15.1)                         | 0.409*  | 3 (15.0)                                   | 68 (12.3)                               | 0.460*  |
| Immunosuppressive medication    | 3 (23.1)                             | 8 (5.8)                           | 0.054*  | 2 (10.0)                                   | 63 (11.4)                               | 0.599*  |

In categorical variables, males were compared to females, obese (BMI  $\geq 30$  kg/m<sup>2</sup>) and underweight (BMI < 18.5 kg/m<sup>2</sup>) patients to patients with BMI greater than or equal to 18.5 to 29.9 kg/m<sup>2</sup>, smokers to non-smokers and patients living in supported housing to patients living independently. The patients with certain underlying condition were compared to those without the underlying condition in question. Continuous variables (age, number of underlying conditions) are presented as mean and standard deviation (SD) and median and interquartile range (IQR: 25th - 75th percentile), categorical variables are presented as number (n) and percent (%). P-values were calculated with Mann-Whitney U test for continuous variables and with chi-square ( $\chi^2$ ) test and Fisher's exact test for categorical variables.

RSV respiratory syncytial virus, BMI Body mass index, COPD chronic obstructive pulmonary disease

\* = calculated with Fischer's Exact Test.

In multivariable logistic regression analyses among all study patients, RSV infection ( $p=0.012$ ), age ( $p=0.003$ ), smoking ( $p=0.001$ ) and number of underlying conditions ( $p<0.001$ ) were positively associated with the likelihood of hospitalization (Table 4). RSV infection ( $p=0.029$ ), age ( $p<0.001$ ) and solid malignancies ( $p=0.042$ ) were positively associated with the all-cause mortality during hospitalization and 30 days after discharge (Table 5).

**Table 4:** Univariable and multivariable logistic regression analyses of factors associated with hospitalization among all study population (n=725).

|                                 | Crude OR<br>(95% CI) | p-value | Adjusted OR<br>(95% CI) | p-value |
|---------------------------------|----------------------|---------|-------------------------|---------|
| RSV infection                   | 2.751 (1.721-4.398)  | <0.001  | 2.035 (1.167-3.546)     | 0.012   |
| Male gender                     | 0.929 (0.676-1.277)  | 0.650   |                         |         |
| Age (years)                     | 1.032 (1.023-1.042)  | <0.001  | 1.021 (1.007-1.035)     | 0.003   |
| Obesity                         | 1.419 (0.892-2.257)  | 0.140   |                         |         |
| Underweight                     | 1.233 (0.475-3.200)  | 0.667   |                         |         |
| Smoking                         | 1.995 (1.189-3.346)  | 0.009   | 2.621 (1.502-4.573)     | 0.001   |
| Number of underlying conditions | 1.611 (1.418-1.830)  | <0.001  | 1.433 (1.210-1.696)     | <0.001  |
| Supported housing               | 1.546 (1.069-2.238)  | 0.021   |                         |         |
| Hypertension                    | 2.864 (2.047-4.007)  | <0.001  |                         |         |
| Ischemic heart disease          | 2.445 (1.641-3.644)  | <0.001  |                         |         |
| Heart failure                   | 3.342 (1.738-6.425)  | <0.001  |                         |         |
| Cerebrovascular disease         | 2.502 (1.449-4.317)  | 0.001   |                         |         |
| COPD                            | 3.190 (1.609-6.325)  | 0.001   |                         |         |
| Asthma                          | 1.323 (0.901-1.942)  | 0.153   |                         |         |
| Solid malignancy                | 1.891 (0.960-3.725)  | 0.065   |                         |         |
| Hematological malignancy        | 0.806 (0.337-1.929)  | 0.628   |                         |         |
| Diabetes                        | 2.310 (1.481-3.602)  | <0.001  |                         |         |
| Chronic kidney disease          | 1.434 (0.754-2.729)  | 0.272   |                         |         |
| Dementia                        | 1.205 (0.739-1.964)  | 0.455   |                         |         |
| Immunosuppressive medication    | 0.814 (0.492-1.346)  | 0.422   |                         |         |

The HL confirmed the goodness of fit for the multivariable model ( $p=0.138$ ). In categorical variables, males were compared to females, obese ( $BMI \geq 30 \text{ kg/m}^2$ ) and underweight ( $BMI < 18.5 \text{ kg/m}^2$ ) patients to patients with BMI greater than or equal to 18.5 to 29.9  $\text{kg/m}^2$ , smokers to non-smokers, patients living in supported housing to patients living independently. The patients with certain underlying condition were compared to those without the underlying condition in question.

RSV respiratory syncytial virus, BMI Body mass index, COPD chronic obstructive pulmonary disease

**Table 5:** Univariable and multivariable logistic regression analyses of factors associated with all-cause mortality during hospitalization and 30 days after discharge among all study population (n=725).

|                                 | Crude OR<br>(95% CI) | p-value | Adjusted OR<br>(95% CI) | p-value |
|---------------------------------|----------------------|---------|-------------------------|---------|
| RSV infection                   | 2.586 (1.255-5.327)  | 0.010   | 2.288 (1.089-4.806)     | 0.029   |
| Male gender                     | 1.188 (0.586-2.407)  | 0.633   |                         |         |
| Age (years)                     | 1.065 (1.031-1.100)  | <0.001  | 1.063 (1.029-1.099)     | <0.001  |
| Obesity                         | 0.633 (0.206-1.942)  | 0.424   |                         |         |
| Underweight                     | -                    | -       |                         |         |
| Smoking                         | 0.411 (0.094-1.807)  | 0.239   |                         |         |
| Number of underlying conditions | 1.290 (1.037-1.606)  | 0.022   |                         |         |
| Supported housing               | 2.848 (1.410-5.753)  | 0.004   |                         |         |
| Hypertension                    | 0.991 (0.493-1.994)  | 0.981   |                         |         |
| Ischemic heart disease          | 1.693 (0.826-3.470)  | 0.151   |                         |         |
| Heart failure                   | 3.473 (1.593-7.570)  | 0.002   |                         |         |
| Cerebrovascular disease         | 2.328 (1.050-5.160)  | 0.037   |                         |         |
| COPD                            | 0.835 (0.249-2.804)  | 0.771   |                         |         |
| Asthma                          | 0.846 (0.361-1.985)  | 0.701   |                         |         |
| Solid malignancy                | 2.793 (1.103-7.075)  | 0.030   | 2.703 (1.038-7.039)     | 0.042   |
| Hematological malignancy        | 2.061 (0.463-9.187)  | 0.343   |                         |         |
| Diabetes                        | 0.981 (0.418-2.305)  | 0.965   |                         |         |
| Chronic kidney disease          | 2.293 (0.848-6.196)  | 0.102   |                         |         |
| Dementia                        | 0.935 (0.321-2.721)  | 0.901   |                         |         |
| Immunosuppressive medication    | 1.562 (0.585-4.173)  | 0.374   |                         |         |

The HL confirmed the goodness of fit for the multivariable model ( $p=0.607$ ). In categorical variables, males were compared to females, obese ( $BMI \geq 30 \text{ kg/m}^2$ ) and underweight ( $BMI < 18.5 \text{ kg/m}^2$ ) patients to patients with BMI greater than or equal to 18.5 to 29.9  $\text{kg/m}^2$ , smokers to non-smokers, patients living in supported housing to patients living independently. The patients with certain underlying condition were compared to those without the underlying condition in question.

RSV respiratory syncytial virus, BMI Body mass index, COPD chronic obstructive pulmonary disease

## Discussion

We examined the number and severity of RSV and influenza infections among adult patients in KUH district in Eastern Finland during the 2017-2018 RSV epidemic season. The majority of the patients in both groups were elderly and had several underlying conditions, but most of them were living independently. However, because of the high general morbidity in population of Eastern Finland, the impact of epidemic RSV and influenza is considerable [22]. Although the high general morbidity in the population studied, patients with RSV in our study did not have an exceptionally high rate of comorbidities compared to previous similar studies [7,9,14,15].

Consistent with previous studies, the patients with RSV were older and had significantly more underlying conditions than those with influenza [8,14,15,21], especially high blood pressure and heart failure. Compared to influenza, RSV caused a more serious disease in terms of hospitalization, secondary pneumonia, blood culture positivity, need for antibiotics and supplementary oxygen. In addition, the all-cause mortality during hospitalization and 30 days after discharge was higher among the RSV-infected patients than those with influenza (8.6% vs. 3.5%) as found in earlier studies [8,14,15,21]. In multivariate analyses, RSV remained as a significant independent risk factor to hospitalization (aOR 2.0,  $p=0.012$ ) and mortality (aOR 2.3,  $p=0.029$ ) compared to influenza. However, though patients with RSV had more serious



1  
2  
3 disease compared to influenza in many terms, the duration of the treatment in the ICU was longer in  
4 influenza-infected patients than those with RSV. The majority of the deaths due to influenza infection  
5 occurred during hospitalization, whereas the majority of the deaths due to RSV infection occurred within 30  
6 days after discharge. RSV-infected patients in our study were generally older and their burden of diseases  
7 was heavier compared to patients with influenza. This may reflect the limited ability of many elderly  
8 patients to recover from serious illness and therefore explain the high mortality after discharge from  
9 hospital.  
10  
11

12 Regarding hospital events in RSV-infected patients, the time in hospital treatment (mean 4.5 vs. 4-9 days),  
13 incidence of pneumonia (37.5% vs. 31-80%) and positive results in blood cultures (4.6% vs. 4%) were in  
14 accordance with other studies [7,8,11,12,13,14,15]. However, hypoxemia and the need of supplementary  
15 oxygen (50.7% vs. 53-68%), ICU admission (3.9% vs. 10-25%) and the use of invasive ventilation (1.3% vs.  
16 10-36%) were less common in our study [7,8,10,11,13]. Separate Step Down Units (SDUs) are in active use  
17 in our own hospital and this might be one explanation for the low ICU admissions. SDUs provide an  
18 intermediate level of care between ICU and the medical wards. One of these SDUs is located in our  
19 pulmonary unit, where intensive observation, treatment and oxygen support like high nasal flow oxygen  
20 therapy and non-invasive ventilation are available. Especially fragile patients and patients with treatment  
21 limitations e.g., withholding of life-sustaining treatment, are treated in SDUs instead of ICU. Interestingly, a  
22 decision not to initiate or escalate a life-sustaining treatment in terminal illness in accordance with  
23 expressed wishes of the patient or surrogate is a widespread practice in Finland. These decisions are more  
24 common in elderly patients, non-surgical patients and those, who have more comorbidities, malignancy  
25 and cardiovascular or respiratory insufficiency [24]. This description correlates quite nicely to hospitalized  
26 RSV-patients in this paper. The exact number of patients who denied intensive treatment in present study  
27 is not known but they also exist. Despite the differences in treatment compared to earlier studies, in-  
28 hospital mortality rate (3,3%) was generally low and in accordance with earlier studies (1.1%-15.9%)  
29 [7,8,10,11,12].  
30  
31  
32  
33

34 The use of antibiotics among both RSV-infected (67.1%) and influenza-infected (47.3%) patients was  
35 common in our study, but lower than reported earlier among RSV-infected patients (76-95%) [7,8,10].  
36 Among patients with influenza, the proportion of patients treated with prophylactic antibiotics has been  
37 reported to be as high as 96.6% [25]. In our study, the proportion of patients with influenza treated with  
38 antibiotics was significantly lower. In both groups, the proportion of those who received antibiotics was  
39 higher than the amount of actual pneumonia diagnoses. In Finland, the antimicrobial resistance has  
40 remained low compared to other countries in European Union due to strict antimicrobial policy [26]. The  
41 lower usage of antibiotics in our study did not increase the mortality rate in RSV-infected patients  
42 compared to other studies where the use of antibiotics had been studied [7,8,10].  
43  
44  
45

46 The number of deceased patients in our study was low, which is in line with previous studies conducted  
47 with RSV- and influenza-infected patients [7,8,9,10,11,12,13,14]. Solid malignancies and chronic kidney  
48 disease were more common among the RSV-infected non-survivors than survivors. Older age and heart  
49 failure were more common among non-survivors than survivors in influenza-infected patients, but not in  
50 RSV-infected patients. In earlier studies, older age has been reported to be a significant factor predicting  
51 mortality in RSV-infected patients [8,9,12,13,14]. Age and previous hematological disease have been  
52 reported to be associated with an increased risk of death during the first 21 days of hospitalization among  
53 both RSV- and influenza-infected patients [12]. As far as we know, our finding that solid malignancies and  
54 chronic kidney disease are factors predicting mortality in RSV infections, has not been reported before.  
55  
56

57 Among all study patients, smoking (aOR 2.621, p=0.001) was positively associated with the increased risk of  
58 hospitalization, but not with mortality. The result is in line with previous studies, where the positive  
59 association with likelihood of hospitalization has been observed, but effect on mortality has been less  
60

conclusive [18]. Unlike reported previously [17], obesity was not associated with the increased risk of hospitalization among influenza-infected and RSV-infected patients in our study. In current study, 15.8% of the patients with RSV and 19.8% with influenza were obese (BMI greater than or equal to 30 kg/m<sup>2</sup>), while on average in Finland 26.1% of men and 27.5% of women over 30-years of age are obese [27]. Still, only 15.4% of the deceased patients with RSV and 10.0% with influenza in our study were obese. When compared to COVID-19, the difference is remarkable, since 28.9% of the deceased patients aged 20 years and older with COVID-19 have been reported to be obese [28].

The study was carried out in a tertiary care hospital, and there was no possibility to gather information about patient recovery from primary care facilities, which is a limitation. During the study period, there was a major RSV epidemic in Finland, which explains the high number of RSV infections compared to influenza infections. During this time, influenza B was more common than influenza A in Finland and total number of influenza infections was higher than in previous years explained by the high prevalence of influenza B [20]. However, there was no significant difference in excess mortality compared to previous influenza seasons during the study time [20].

In our study RSV infection was associated with increased likelihood of hospitalization and mortality compared to influenza. The patients with RSV infection were older and had more underlying conditions than the patients with influenza. No difference in BMI or smoking status was found, but solid malignancies and chronic kidney disease were shown to be independent risk factors for death among RSV-infected patients. During RSV and influenza epidemics, it is important to test all hospitalized patients with respiratory symptoms to prevent the spread of infection by using contact and respiratory precautions as well as isolation and cohorting of infected patients. The same practices are important in managing COVID-19 infected patients.

**Patient consent for publication:** Not applicable.

**Ethics approval:** This registry study was approved by a local ethics committee (the Research Ethics Committee of the Northern Savo Hospital District; 1107/13.02.00/2018). This study was conducted according to the principles expressed in the Declaration of Helsinki.

#### **Data availability statement**

Due to legal and ethical restrictions, no additional data is available.

**Contributors:** **Alexi Hämäläinen:** Conceptualization, Methodology, Validation, Formal analysis, Investigation, Data Curation, Writing - Original Draft and Reviewing & Editing, Visualization; **Ellamaria Savinainen:** Conceptualization, Validation, Resources, Investigation, Data Curation, Writing - Original Draft and Reviewing & Editing, Visualization; **Sari Hämäläinen:** Conceptualization, Methodology, Validation, Formal analysis, Writing - Review & Editing, Visualization; **Katariina Sivenius:** Conceptualization, Methodology, Validation, Formal analysis, Writing - Review & Editing, Visualization; **Juha Kauppinen:** Conceptualization, Methodology, Data Curation, Writing - Review & Editing; **Irma Koivula:** Conceptualization, Methodology, Validation, Writing - Reviewing & Editing, Visualization; **Riitta-Liisa Patovirta:** Conceptualization, Methodology, Writing - Review & Editing, Supervision, Project administration. All authors approved the final version of the manuscript.

**Funding:** This research received no specific grant from any funding agency in the public, commercial or not-for-profit sectors

**Competing interests:** None declared.



## References

1. Simoes EA. Respiratory syncytial virus infection. *Lancet* 1999;**354**(9181):847-52.
2. Falsey A, Hennessey P, Formica M, *et al.* Respiratory Syncytial Virus Infection in Elderly and High-Risk Adults. *N Engl J Med* 2005;**352**(1), 1749–1759.
3. Tartuntataudit Suomessa 2020, Finnish Institute for Health and Welfare.
4. Li Y, Reeves RM, Wang X, *et al.* Global patterns in monthly activity of influenza virus, respiratory syncytial virus, parainfluenza virus, and metapneumovirus: a systematic analysis. *Lancet Glob Health*. 2019;**7**(8):e1031-e1045.
5. Tin Tin Htar M, Yerramalla MS, Moisi JC, *et al.* The burden of respiratory syncytial virus in adults: a systematic review and meta-analysis. *Epidemiology and Infection* 2020;**148**, E48.
6. Shi T, Denouel A, Tietjen AK, *et al.* Global Disease Burden Estimates of Respiratory Syncytial Virus-Associated Acute Respiratory Infection in Older Adults in 2015: A Systematic Review and Meta-Analysis. *J Infect Dis*. 2020;**222**(Supplement\_7):S577-S583.
7. Chuaychoo B, Ngamwongwan S, Kaewnaphan B., *et al.* Clinical manifestations and outcomes of respiratory syncytial virus infection in adult hospitalized patients. *Journal of Clinical Virology* 2019;**117**: 103–108.
8. Cohen R, Babushkin F, Geller K, *et al.* Characteristics of hospitalized adult patients with laboratory documented Influenza A, B and Respiratory Syncytial Virus – A single center retrospective observational study. *PLoS One* 2019;**14**(3): e0214517.
9. Wyffels V, Kariburyo F, Gavart S, *et al.* A Real-World Analysis of Patient Characteristics and Predictors of Hospitalization Among US Medicare Beneficiaries with Respiratory Syncytial Virus Infection. *Advanced Therapeutics* 2020;**37**(3):1203–1217.
10. Vos LM, Oosterheert JJ, Hoepelman AIM, *et al.* External validation and update of a prognostic model to predict mortality in hospitalized adults with RSV: A retrospective Dutch cohort study. *Journal of Medical Virology* 2019;**91**(12):2117–2124.
11. Yoon JG, Noh JY, Choi WS, *et al.* Clinical characteristics and disease burden of respiratory syncytial virus infection among hospitalized adults. *Scientific Reports* 2020;**10**(1):12106.
12. Prasad N, Newbern EC, Trenholme AA, *et al.* The health and economic burden of respiratory syncytial virus associated hospitalizations in adults. *PLoS ONE* 2020;**15**(6): e0234235.
13. Lee N, Lui GCY, Wong KT, *et al.* High Morbidity and Mortality in Adults Hospitalized for Respiratory Syncytial Virus Infections. *Clinical Infectious Diseases* 2013;**57**(8), 1069–1077.
14. Zhang Y, Wang Y, Zhao J, *et al.* [Severity and mortality of respiratory syncytial virus vs influenza A infection in hospitalized adults in China. \*Influenza and Other Respiratory Viruses\* 2020;\*\*14\*\*\(5\):483–490.](#)
15. Ackerson B, Tseng HF, Sy LS, *et al.* Severe Morbidity and Mortality Associated With Respiratory Syncytial Virus Versus Influenza Infection in Hospitalized Older Adults. *Clinical Infectious Diseases* 2019;**69**(2):197–203.
16. Loubet P, Lenzi N, Valette M, *et al.* Clinical characteristics and outcome of respiratory syncytial virus infection among adults hospitalized with influenza-like illness in France. *Clinical Microbiology and Infection* 2017;**23**(4), 253–259.

1  
2  
3  
4  
5  
6  
7  
8  
9  
10  
11  
12  
13  
14  
15  
16  
17  
18  
19  
20  
21  
22  
23  
24  
25  
26  
27  
28  
29  
30  
31  
32  
33  
34  
35  
36  
37  
38  
39  
40  
41  
42  
43  
44  
45  
46  
47  
48  
49  
50  
51  
52  
53  
54  
55  
56  
57  
58  
59  
60

17. Moser JS, Galindo-Fraga A, Ortiz-Hernández AA, *et al.* Underweight, overweight, and obesity as independent risk factors for hospitalization in adults and children from influenza and other respiratory viruses. *Influenza Other Respir Viruses* 2019;**13**(1):3-9.
18. Han L, Ran J, Mak YW, *et al.* Smoking and Influenza-associated Morbidity and Mortality: A Systematic Review and Meta-analysis. *Epidemiology* 2019;**30**(3):405-417.
19. Falsey A, Hennessey Patricia A, Formica M, *et al.* Respiratory Syncytial Virus Infection in Elderly and High-Risk Adults. *N Engl J Med* 2005;**352**(1), 1749–1759.
20. Ikonen N, Murtopuro S, Haveri A, *et al.* Influenssakausi Suomessa, viikot 40/2017-20/2018: Seurantaraportti. Finland: National Institute for Health and Welfare; 2018.
21. Kwon Y, Park S, Kim M., *et al.* Risk of mortality associated with respiratory syncytial virus and influenza infection in adults. *BMC Infectious Diseases* 2017;**17**(1), 785.
22. THL's Morbidity Index: <https://thl.fi/en/web/thlfi-en/statistics-and-data/statistics-by-topic/morbidity/thl-s-morbidity-index>. Accessed 4.1.2022.
23. Obesity: preventing and managing the global epidemic. Report of a WHO consultation. *World Health Organ Tech Rep Ser.* 2000;**894**:i-xii, 1-253.
24. Adamski J, Weigl W, Lahtinen P, *et al.* Intensive care patient survival after limiting life-sustaining treatment-The FINNEOL\* national cohort study. *Acta Anaesthesiol Scand.* 2020;**64**(8):1144-1153.
25. Manohar P, Loh B, Nachimuthu R, *et al.* Secondary Bacterial Infections in Patients With Viral Pneumonia. *Front Med (Lausanne)* 2020;**7**:420.
26. European Centre for Disease Prevention and Control. Antimicrobial resistance in the EU/EEA (EARS-Net) - Annual Epidemiological Report 2019. Stockholm: ECDC; 2020
27. Koponen P, Borodulin K, Lundqvist A, *et al.* Terveys, toimintakyky ja hyvinvointi Suomessa - FinTerveys2017-tutkimus. Raportti 4/2018. Terveysten ja hyvinvoinnin laitos, Helsinki.
28. Gao M, Piernas C, Astbury NM, *et al.* Associations between body-mass index and COVID-19 severity in 6.9 million people in England: a prospective, community-based, cohort study. *Lancet Diabetes Endocrinol.* 2021;**9**(6):350-359.

STROBE Statement—Checklist of items that should be included in reports of *cohort studies*

|                              | Item No | Recommendation                                                                                                                                                                                    | Page No |
|------------------------------|---------|---------------------------------------------------------------------------------------------------------------------------------------------------------------------------------------------------|---------|
| <b>Title and abstract</b>    | 1       | (a) Indicate the study's design with a commonly used term in the title or the abstract                                                                                                            | 1       |
|                              |         | (b) Provide in the abstract an informative and balanced summary of what was done and what was found                                                                                               | 1       |
| <b>Introduction</b>          |         |                                                                                                                                                                                                   |         |
| Background/rationale         | 2       | Explain the scientific background and rationale for the investigation being reported                                                                                                              | 2       |
| Objectives                   | 3       | State specific objectives, including any prespecified hypotheses                                                                                                                                  | 2       |
| <b>Methods</b>               |         |                                                                                                                                                                                                   |         |
| Study design                 | 4       | Present key elements of study design early in the paper                                                                                                                                           | 3       |
| Setting                      | 5       | Describe the setting, locations, and relevant dates, including periods of recruitment, exposure, follow-up, and data collection                                                                   | 3       |
| Participants                 | 6       | (a) Give the eligibility criteria, and the sources and methods of selection of participants. Describe methods of follow-up                                                                        | 3       |
|                              |         | (b) For matched studies, give matching criteria and number of exposed and unexposed                                                                                                               | 3       |
| Variables                    | 7       | Clearly define all outcomes, exposures, predictors, potential confounders, and effect modifiers. Give diagnostic criteria, if applicable                                                          | 3       |
| Data sources/<br>measurement | 8*      | For each variable of interest, give sources of data and details of methods of assessment (measurement). Describe comparability of assessment methods if there is more than one group              | 3       |
| Bias                         | 9       | Describe any efforts to address potential sources of bias                                                                                                                                         | 3       |
| Study size                   | 10      | Explain how the study size was arrived at                                                                                                                                                         | 3       |
| Quantitative variables       | 11      | Explain how quantitative variables were handled in the analyses. If applicable, describe which groupings were chosen and why                                                                      | 3       |
| Statistical methods          | 12      | (a) Describe all statistical methods, including those used to control for confounding                                                                                                             | 3       |
|                              |         | (b) Describe any methods used to examine subgroups and interactions                                                                                                                               | 3       |
|                              |         | (c) Explain how missing data were addressed                                                                                                                                                       | 4       |
|                              |         | (d) If applicable, explain how loss to follow-up was addressed                                                                                                                                    | -       |
|                              |         | (e) Describe any sensitivity analyses                                                                                                                                                             | 3       |
| <b>Results</b>               |         |                                                                                                                                                                                                   |         |
| Participants                 | 13*     | (a) Report numbers of individuals at each stage of study—eg numbers potentially eligible, examined for eligibility, confirmed eligible, included in the study, completing follow-up, and analysed | 4       |
|                              |         | (b) Give reasons for non-participation at each stage                                                                                                                                              | 4       |
|                              |         | (c) Consider use of a flow diagram                                                                                                                                                                | -       |
| Descriptive data             | 14*     | (a) Give characteristics of study participants (eg demographic, clinical, social) and information on exposures and potential confounders                                                          | 4       |
|                              |         | (b) Indicate number of participants with missing data for each variable of interest                                                                                                               | -       |
|                              |         | (c) Summarise follow-up time (eg, average and total amount)                                                                                                                                       | 4       |
| Outcome data                 | 15*     | Report numbers of outcome events or summary measures over time                                                                                                                                    | 4-8     |

|    |                          |    |                                                                                                                                                                                                              |       |
|----|--------------------------|----|--------------------------------------------------------------------------------------------------------------------------------------------------------------------------------------------------------------|-------|
| 1  | Main results             | 16 | (a) Give unadjusted estimates and, if applicable, confounder-adjusted estimates and their precision (eg, 95% confidence interval). Make clear which confounders were adjusted for and why they were included | 7-9   |
| 2  |                          |    | (b) Report category boundaries when continuous variables were categorized                                                                                                                                    | 4-8   |
| 3  |                          |    | (c) If relevant, consider translating estimates of relative risk into absolute risk for a meaningful time period                                                                                             | -     |
| 4  |                          |    |                                                                                                                                                                                                              |       |
| 5  | Other analyses           | 17 | Report other analyses done—eg analyses of subgroups and interactions, and sensitivity analyses                                                                                                               | -     |
| 6  |                          |    |                                                                                                                                                                                                              |       |
| 7  |                          |    |                                                                                                                                                                                                              |       |
| 8  |                          |    |                                                                                                                                                                                                              |       |
| 9  |                          |    |                                                                                                                                                                                                              |       |
| 10 |                          |    |                                                                                                                                                                                                              |       |
| 11 | <b>Discussion</b>        |    |                                                                                                                                                                                                              |       |
| 12 | Key results              | 18 | Summarise key results with reference to study objectives                                                                                                                                                     | 10-11 |
| 13 | Limitations              | 19 | Discuss limitations of the study, taking into account sources of potential bias or imprecision. Discuss both direction and magnitude of any potential bias                                                   | 12    |
| 14 | Interpretation           | 20 | Give a cautious overall interpretation of results considering objectives, limitations, multiplicity of analyses, results from similar studies, and other relevant evidence                                   | 10-12 |
| 15 | Generalisability         | 21 | Discuss the generalisability (external validity) of the study results                                                                                                                                        | 10-12 |
| 16 |                          |    |                                                                                                                                                                                                              |       |
| 17 |                          |    |                                                                                                                                                                                                              |       |
| 18 |                          |    |                                                                                                                                                                                                              |       |
| 19 |                          |    |                                                                                                                                                                                                              |       |
| 20 |                          |    |                                                                                                                                                                                                              |       |
| 21 |                          |    |                                                                                                                                                                                                              |       |
| 22 | <b>Other information</b> |    |                                                                                                                                                                                                              |       |
| 23 | Funding                  | 22 | Give the source of funding and the role of the funders for the present study and, if applicable, for the original study on which the present article is based                                                | 12    |
| 24 |                          |    |                                                                                                                                                                                                              |       |
| 25 |                          |    |                                                                                                                                                                                                              |       |
| 26 |                          |    |                                                                                                                                                                                                              |       |

27 \*Give information separately for exposed and unexposed groups.

28  
29  
30 **Note:** An Explanation and Elaboration article discusses each checklist item and gives methodological background and published examples of transparent reporting. The STROBE checklist is best used in conjunction with this article (freely available on the Web sites of PLoS Medicine at <http://www.plosmedicine.org/>, Annals of Internal Medicine at <http://www.annals.org/>, and Epidemiology at <http://www.epidem.com/>). Information on the STROBE Initiative is available at <http://www.strobe-statement.org>.

31  
32  
33  
34  
35  
36  
37  
38  
39  
40  
41  
42  
43  
44  
45  
46  
47  
48  
49  
50  
51  
52  
53  
54  
55  
56  
57  
58  
59  
60
